# Supplementary material for: Melatonin Enhances Osteoblastogenesis from Senescent Mesenchymal Stem Cells via MMSET Mediated Chromatin Remodeling
Source: Research Square preprint supplement (doi:10.21203/rs.3.rs-130548/v1), 2021-01-04
Supplement: Supplementary file 1 [file 31cf3f4eb9b53f4cd82127e7.docx]

**Extended methods**

**Isolation and culture of bone marrow-derived MSCs**

For MSCs isolation from young and elderly healthy donors or osteoporosis patients, 3-5 mL of bone marrow biopsies were diluted up to 10 mL with high-glucose Dulbecco's modified Eagle medium (DMEM) (Gibco, Life Technologies, Carlsbad, CA, USA) and gently loaded onto the top of 10 mL Ficoll Paque Plus (GE Healthcare, Wauwatosa, Wisconsin, USA) and cells were then fractionated on a lymphoprep density gradient by centrifugation at 800×g for 25 minutes at room temperature with the acceleration at 1. After centrifuge, interfacial mononuclear cells were collected, and washed with phosphatebuffered saline (PBS) at 300× g for 10 minutes at room temperature twice, resuspended in DMEM supplemented with 10% fetal bovine serum (FBS) (Gibco, Life Technologies, Carlsbad, CA, USA), 100 U/mL of penicillin, 100 µg/mL of streptomycin, and 2 mM L-glutamine (Gibco, Life Technologies, Carlsbad, CA, USA), seeded, and incubated at 37°C/5% CO2. For MSCs isolation from femur of human fetuses and mouse, bone marrow was cultured directly in culture media. After 48 hours, nonadherent cells were removed by changing the medium. Thereafter, the medium was changed every two days. When the cells reached 85%-95% confluence, they were trypsinized, counted, and plated again. Cells from passages 3-6 were used for the experiments.

**Transfection, virus package and infection**

Transient transfections to HEK293T cells were performed using polyethyleneimine (PEI) (ThermoFisher Scientific, Carlsbad, CA, USA) in the OPTI-MEM medium (Life Technologies, Carlsbad, CA, USA) with a ratio of 1: 4 to 1: 6 of DNA: PEI. Viral particles were produced by HEK293T cells in a 10 cm dish transfected with 4 μg PMD2G and 6 μg psPAX2 packaging plasmids (Addgene, Watertown, MA, USA) , together with 8 μg lentiviral expressing vectors encoding target genes, including pCMV3-C-HA-MMSET, pLKO.1 vector encoding shRNAs targeting *MMSET* gene or *DNMT3b* gene. Supernatant carrying the viral particles was harvested 60 hours after transfection and concentrated to 100× volume by Poly (ethylene glycol) 8,000 (Sigma-Aldrich, St. Louis, MS, USA).

For viral infection, 2×105 MSCs were seeded in 1 mL new complete media for 6 hours and then added 50 μL viral concentration and 8 μg/mL polybrene, and cells were spin at 1800 rpm for 45 minutes at 20°C. 12 hours after spinfection, the medium was changed and cells were cultured for another 48 hours until further management.

**Quantitative reverse transcription polymerase chain reaction (qRT-PCR)**

Total RNA was extracted from cells in different treatment groups using Trizol (Life Technologies, South San Francisco, CA USA) and then converted to cDNA using the 5× All-In-One reverse transcription MasterMix (abm, Vancouver, Canada) according to the manufacturer's instructions. qRT-PCR was performed on a QuantStudio 3 Real-Time PCR System (Applied Biosystems) using EvaGreen 2× qPCR MasterMix (abm, Vancouver, Canada). Expression levels of the following genes were analyzed: *AANAT, HIOMT, RUNX2*, *COL1A1*, *OPN*, *SP7*, *BGLAP*, *MT1*, *MT2*, *DNMT1*, *DNMT3a*, *DNMT3b* and *MMSET*. The expression level of the glyceraldehyde-3-phosphate dehydrogenase (*GAPDH*) gene served as a reference. The Ct value of the *GAPDH* was subtracted from the Ct value of the target gene (ΔCt), and the average ΔCt value of the triplicates was recorded. The relative expression levels of each gene were determined using the 2-ΔΔCt method.

**Western blotting**

Protein lysates were prepared in RIPA-buffer (50 mM Tris-Hcl, pH 7.5, 150 mM NaCl, 10 mM EDTA, 0.5% sodium deoxycholate, 1% NP-40, 1 mM sodium ovanadate, 10 μg/mL aprotinin, 1 mM phenylmethanesulfonyl fluoride, and 10 μg/mL leupeptin) supplemented with complete protease inhibitors (Roche, Indianapolis, IN, USA). The protein concentration was determined using the BCA protein assay kit (ThermoFisher Scientific, Carlsbad, CA, USA). Cell lysate (50 μg) was separated by electrophoresis on SDS-PAGE gel and transferred to nitrocellulose membranes (Pall Corporation, Washington, NY, USA). Membranes were blocked with 5% non‑fat milk for 1 hour at room temperature and probed overnight at 4°C with specific antibodies. Antibodies used in this study were listed in the **supplementary resources**. Membranes were washed three times in PBST the next day, then incubated with horseradish peroxidase-conjugated secondary antibodies for 1 hour at room temperature, washed three times with PBST and finally bands were visualized using an enhanced chemiluminescence system (Millipore, Los Angeles, CA USA). The representative Western blot images for at least three independent experiments shown in the figures have been cropped and auto contrasted.

**Senescence β-Galactosidase Staining**

MSCs were cultured in 6-well plate for indicated time, then culture medium were removed and washed once with 2 mL of 1× PBS. After cells were fixed with 1 mL of fixative solution for 15 min at room temperature and washed three times with 2 mL of 1× PBS, 1 mL of the staining solution was added to incubate cells at 37°C for hours until chromogenic reaction achieved.

**Osteogenesis induction *in vitro***

MSCs were cultured in a 6-well plate with complete medium. After reaching 80% confluence, the medium was changed to osteogenic differentiation medium in presence or absence of 1 μmol/L melatonin for 14 days with a medium change every 3 days. The osteogenic differentiation medium was composed of high-glucose DMEM, penicillin (100 U/mL), streptomycin (100 µg/mL), dexamethasone (0.1 μmol/L), 10% FBS, ascorbic acid (50 μg/mL), and β-glycerol phosphate (10 mmol/L). Osteogenic differentiation was detected by Alizarin Red S staining or alkaline phosphatase assay (ALP).

**Alizarin Red S staining quantitation assay**

The culture medium was aspirated and the cells were washed three times with PBS. Then, the cells were fixed with fresh 70% ethanol for 60 minutes at 4°C or fresh 95% ethanol for 10 minutes at room temperature, washed three times with PBS, and stained with 40 mM Alizarin Red S solution, pH 4.2 (Sigma-Aldrich, St. Louis, MS, USA) for 5-10 minutes at room temperature. Removed the Alizarin Red S solution and wash it with PBS to stop the color reaction. The images were captured with a visible light microscope. To quantify the Alizarin Red staining intensity, stained cells were incubated with a 10% (w/v) solution of cetyl pyridinium chloride (Sigma-Aldrich, St. Louis, MS, USA) in 10 mmol/L Na-phosphate buffer (pH 7.0) for 15 minutes at room temperature, then 200 μL of supernatant was transferred to a 96-well plate and read by measuring the absorbance at 562 nm with a microplate reader. Each experiment was performed in triplicate.

**Alkaline phosphatase assay and quantification**

Osteogenic differentiation was detected by Alkaline Phosphatase staining. Briefly, the culture medium was aspirated and the cells were fixed with 10% neutral formalin buffer for 10 minutes, washed three times with 1×PBS, and stained with alkaline phosphatase dyeing working solution (Beyotime) at room temperature in dark for 10 minutes or longer, until the color developed to the desired depth. Removed the dyeing working solution and wash it with deionized water for 1-2 times to stop the color reaction. The images were captured with a visible light microscope. To quantify the ALP activity in control and osteoblast-differentiated MSCs, we used the Alkaline Phosphatase Assay Kit (Colorimetric) (BioVision) with modified protocols. Cells were cultured in under normal or osteogenic induction conditions. On day 7, wells were rinsed once with PBS and were fixed using 3.7% formaldehyde in 90% ethanol for 30 seconds at room temperature; then fixative was removed and 50 µL of p-nitrophenyl phosphate solution was added to each well and incubated for 60 minutes in the dark at room temperature until a clear yellow color developed. Reaction was subsequently stopped by adding 20 µL of stop solution. Optical density was then measured at 405nm using a SpectraMax/M5 fluorescence spectrophotometer plate reader. The data were then analyzed by evaluating the increase in ALP expression of the treated samples compared to the untreated. Each experiment was performed in triplicate.

**ELISA**

Melatonin level in bone marrow plasma was measured using a human MT(Melatonin) ELISA Kit (Elabscience, Cat: E-EL-H2016c, Wuhan, China) accordingly. Briefly, bone marrow plasma from young (n=15, aging 17-45 years, median =30, 11 males and 4 females) and elderly donors (n=24, aging 56-84 years, median=65.5, 15 males and 9 females) were diluted at 1:5 with sample dilution buffer and added into the plate with primary antibody for incubation at 37°C for 45 min. Afterward, secondary antibody were prepared accordingly and added into samples at 37°C for 30 min. Then, the substrate was added to develop the signal for detection. Determine the optical density (OD value) of each well at once with a micro-plate reader set to 450 nm.

**Chromatin-immunoprecipitation (ChIP), ChIP-qPCR and ChIP-sequencing (ChIP-seq)**

20 million cells were washed in PBS and cross-linked with 1% formaldehyde for 10 minutes at room temperature and then quenched by addition of glycine (125 mM final concentration) for 5 minutes. For Nuclei isolation, cells were resuspended in cell lysis buffer (50 mM Tris, pH 8.0, 140 mM NaCl, 1 mM EDTA, 10% glycerol, 0.5% NP-40, 0.25% Triton X-100), incubated the tube on ice for 20 minutes to swell. Harvested the nuclei by centrifugation at 2000 g for 5 minutes at 4°C resuspended in 1 mL ChIP lysis buffer (1% SDS, 10 mM EDTA, 50 mM Tris-HCl, pH 8.0) and incubated on ice for 10 minutes. Chromatin was fragmented to 200-500 bp using 10 cycles using the Vibra-Cell Ultrasonic Liquid Processors (SONICS, Newtown, CT, USA). For each IP, chromatin was immunoprecipitated with 2 µg of antibody in IP dilution buffer (1% Triton X-100, 2 mM EDTA, 150 mM NaCl, 20 mM Tris-HCl, pH 8.0) at 4°C overnight. Chromatin was precleared for 2 hours each with protein G agarose beads (Cell Signaling Technology，Danvers, MA, USA) before immunoprecipitation. The immunoprecipitated material was washed, once in TSE I buffer (20 mM Tris-HCl, pH 8.0, 2 mM EDTA, pH 8.0, 150 mM NaCl, 1% Triton X-100, 0.1% SDS), once in TSE II buffer (20 mM Tris-HCl, pH 8.0, 2 mM EDTA, pH 8.0, 500 mM NaCl, 1% Triton X-100, 0.1% SDS), once in LiCl buffer (10 mM Tris-HCl, pH 8.1, 250 mM LiCl, 1% deoxycholate, 1% NP40, 1mM EDTA) and once in TE buffer (10 mM Tris, pH 8.0, 1 mM EDTA, pH 8.0) before elution in elution buffer (100 mM NaHCO3, 1% SDS). The samples were removed from beads, reversed cross-linked overnight at 65°C and DNA was isolated using QIAquick PCR Purification Kit (QIAGEN, Germantown, MD, USA). Precipitated DNA was analyzed by qPCR or high-throughput sequencing (Novogene Co., Ltd.). Antibodies used in this study were listed in the **supplementary resources**.

**Gene expression microarray**

Total RNA was extracted from MSC cells of different age groups using TRIzol reagent (Life Technologies, South San Francisco, CA USA) according to the manufacturer's instructions. Quality of the purified RNA was tested on Agilent 2100 Bio analyzer (Agilent RNA 6000 Nano Kit) (BGI, Shenzhen, China). Libraries for cluster generation and DNA sequencing were prepared following an adapted method from BGISEQ-500 platform. The low quality reads (more than 20% of the bases qualities are lower than 10) were filtered to get the clean reads. Then those clean reads were assembled into Unigenes, followed with Unigene functional annotation, SSR detection and calculate the Unigene expression levels and SNPs of each sample. Finally, DEGs (differential expressed genes) were identified between samples and do clustering analysis and functional annotations.

**Reduced representation bisulfite sequencing (RRBS)**

DNA was extracted from MSC cells of different age groups using Roche kit according to the manufacturer's instructions. Digesting DNA using the *MspⅠ* restriction enzyme, which cuts DNA at its recognition site (C↓CGG) independent of the CpG methylation status, then, repairing the end and ligating adapters for Illumina sequencing, selecting gel-based DNA fragments with insert sizes ranging from 160 bp to 400 bp, bisulfite treated two successive rounds, after which we observed 98% converted cytosines outside the CpGs, the bisulfite-converted library was used to PCR amplification for 20 cycles, finally, single-read sequencing for 76 cycles using an Illumina Genome Analyzer II.
