# Supplementary material for: Melatonin Enhances Osteoblastogenesis from Senescent Mesenchymal Stem Cells via MMSET Mediated Chromatin Remodeling
Source: Research Square preprint supplement (doi:10.21203/rs.3.rs-130548/v1), 2021-01-04
Supplement: Supplementary file 3 [file fb0e2ec8221b0a77b2341eb8.docx]

**Original Western blots**

**Fig 2d**

**MMSET**

**
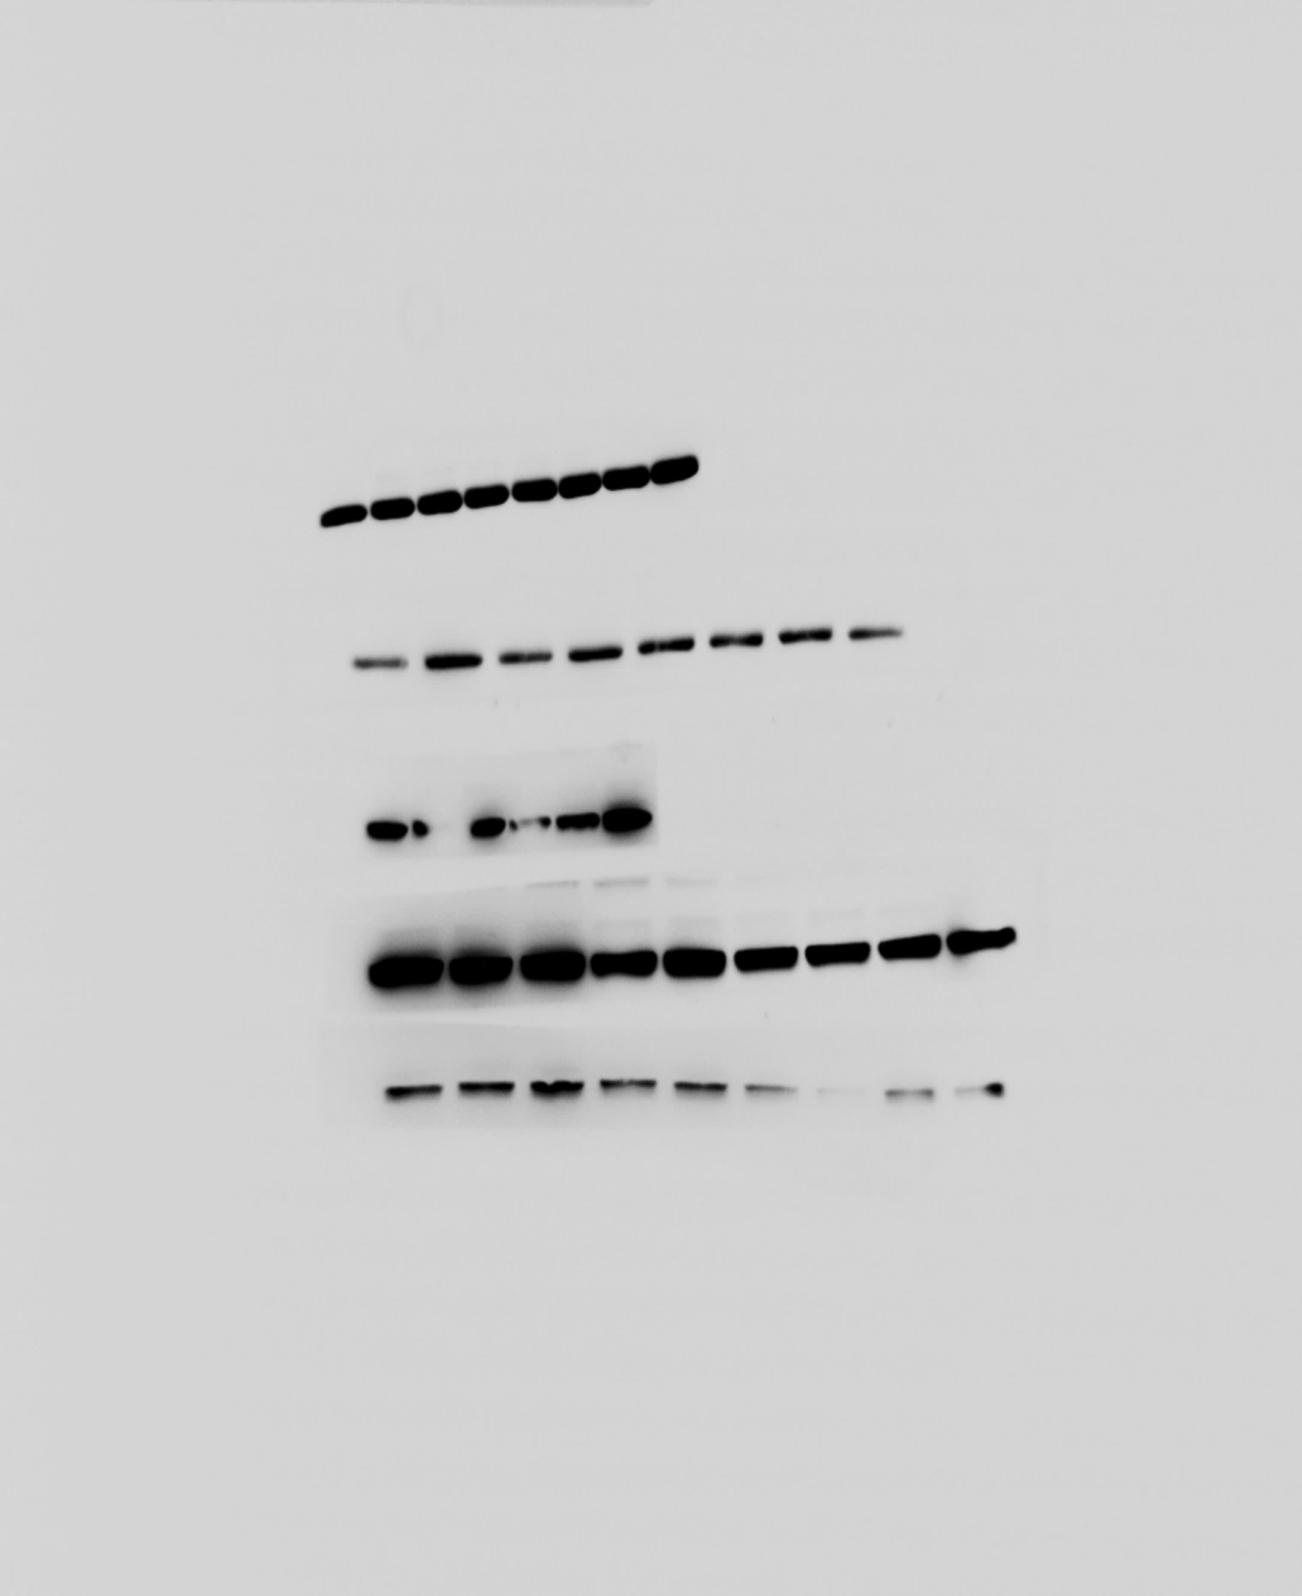
**

**β-Actin**

**
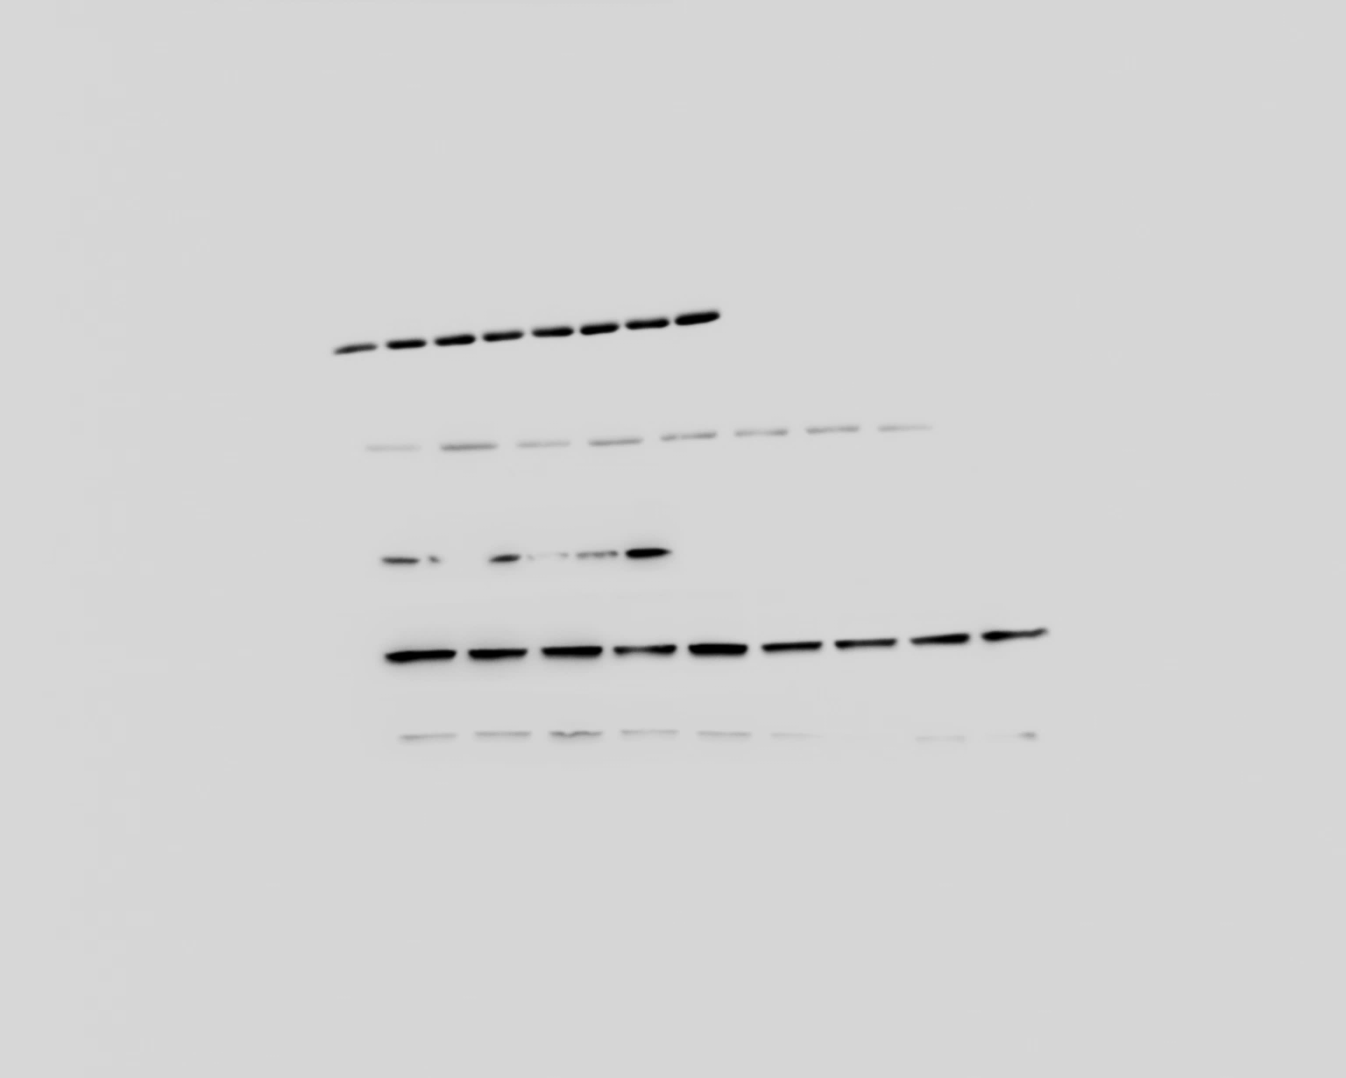
**

**Fig 3g**

**MMSET**

**
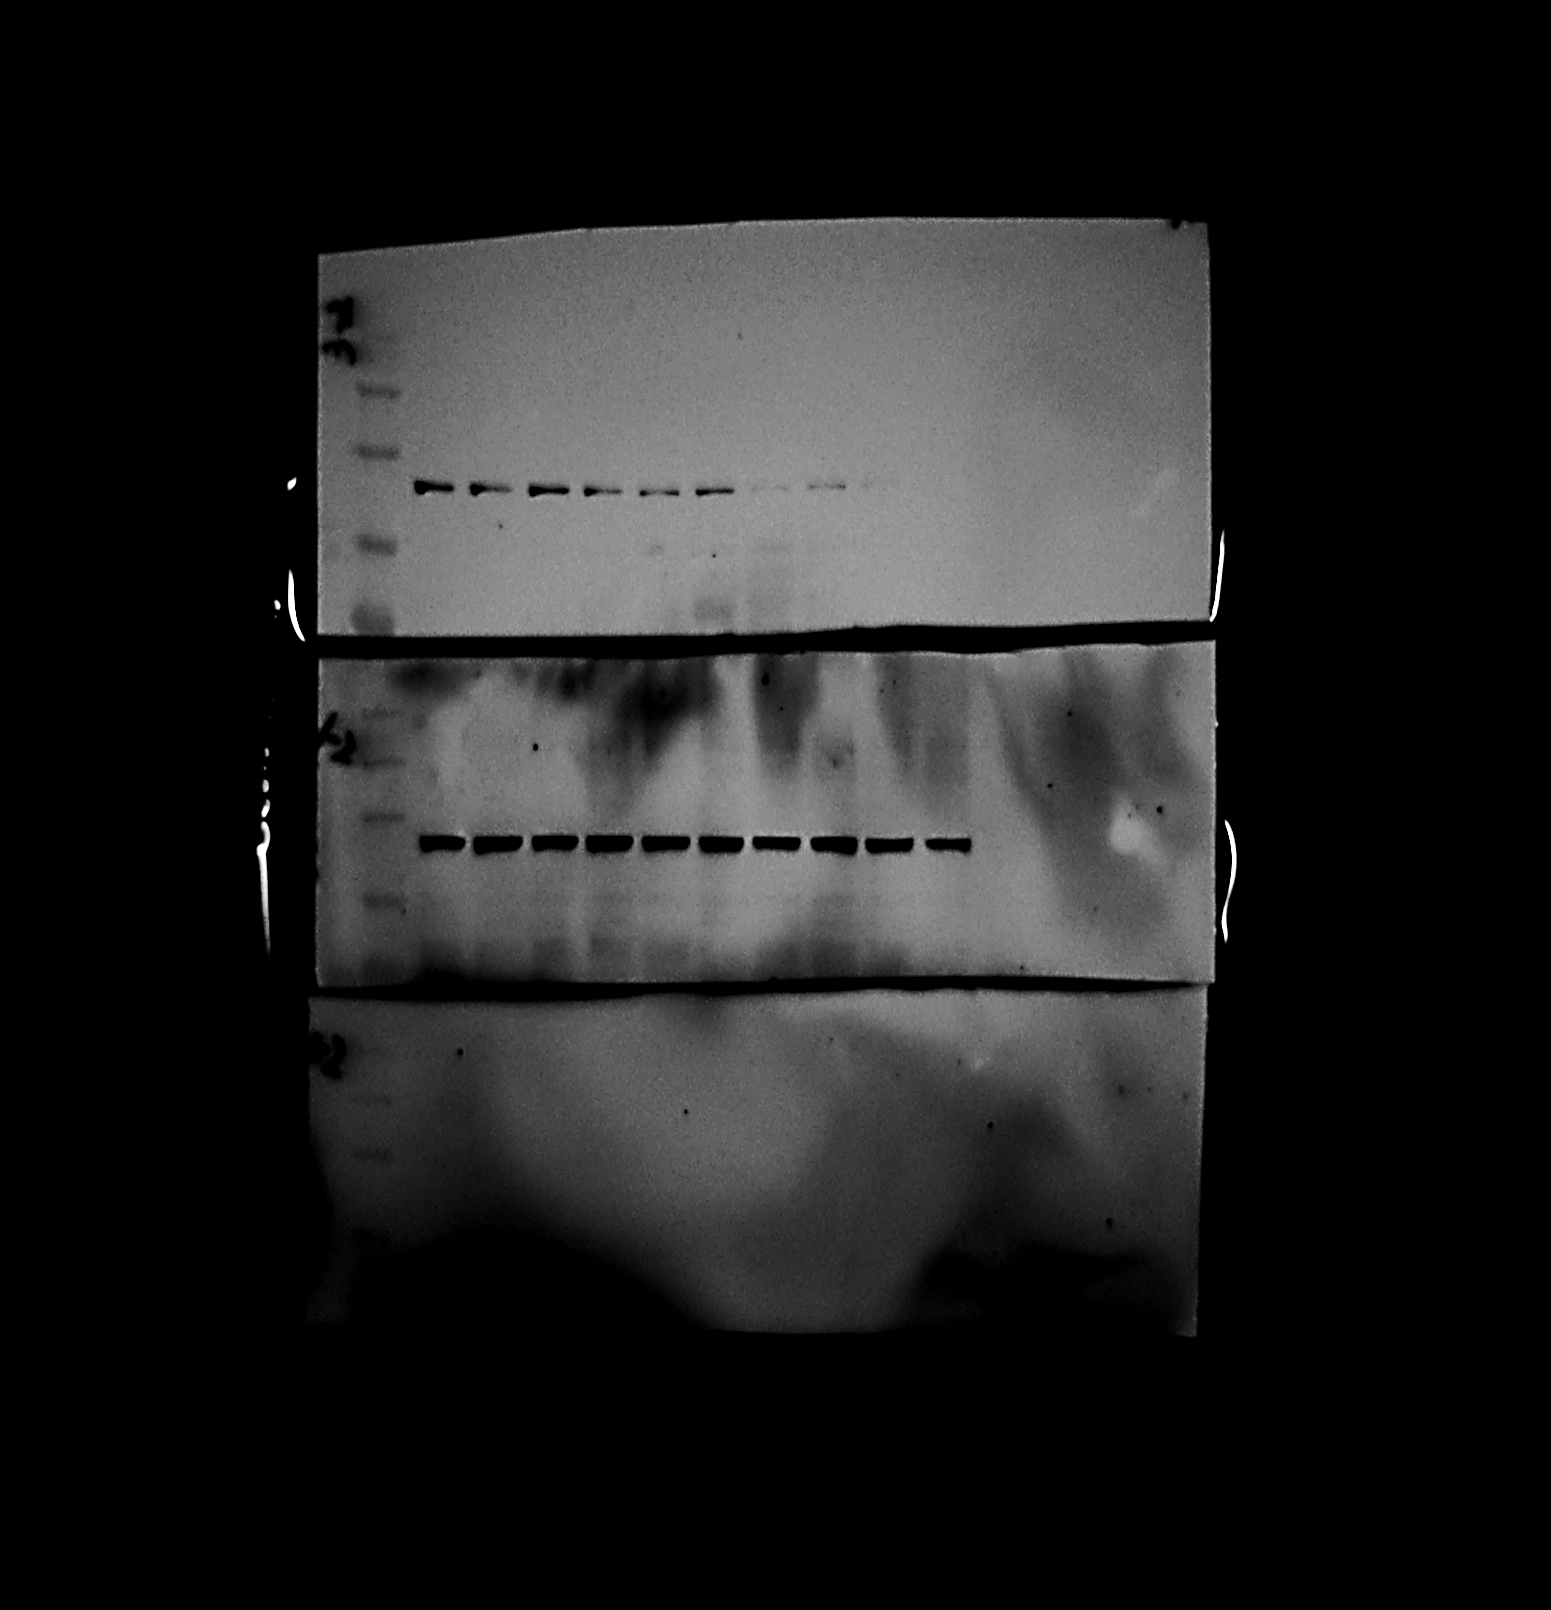
**

**β-Actin**

**
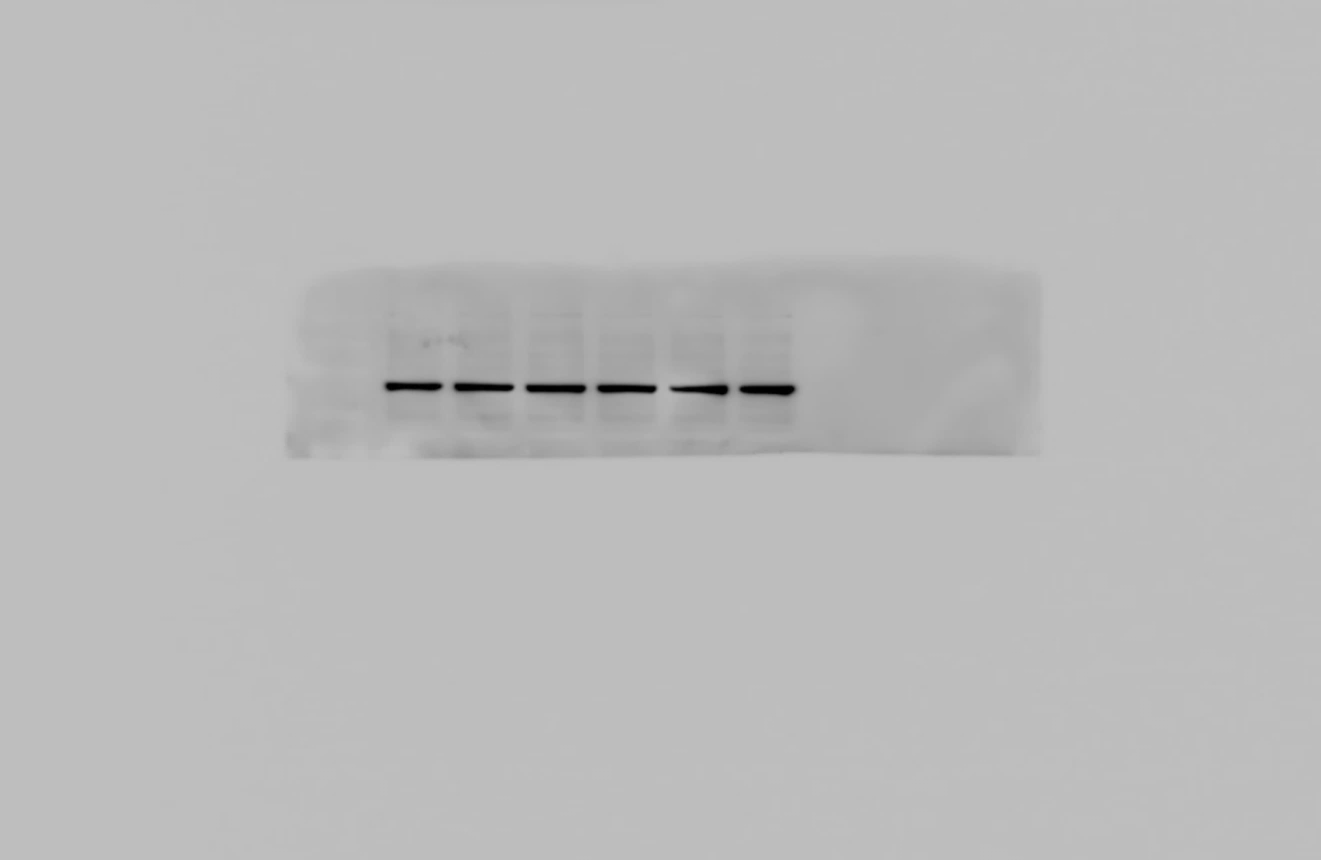
**

**Fig 4b**

**#1 MMSET**


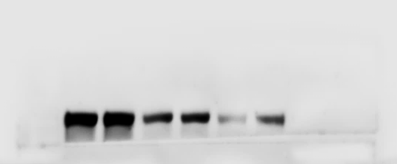


**β-Actin**

**
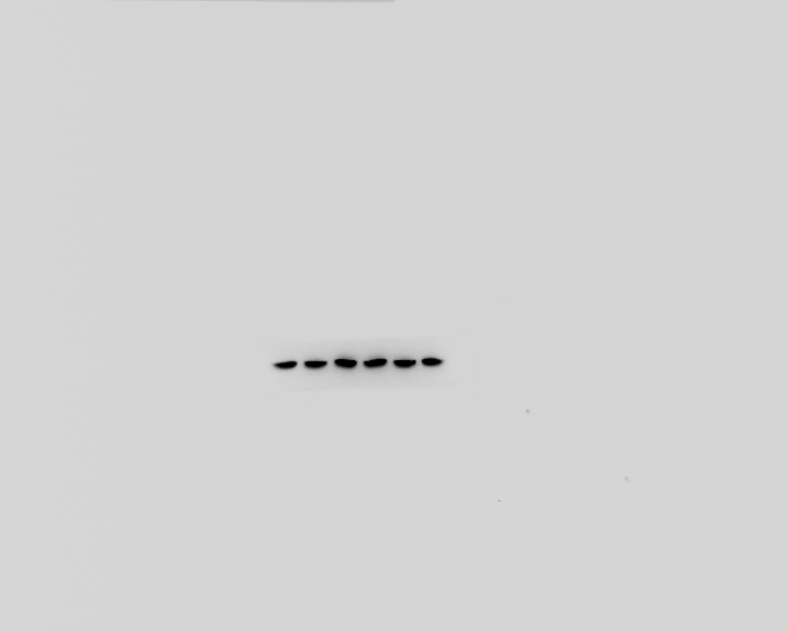
**

**#2 MMSET**

**
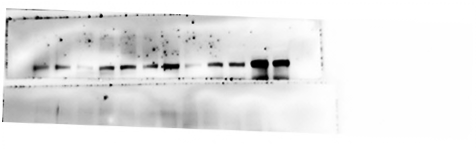
**

**β-Actin**

**
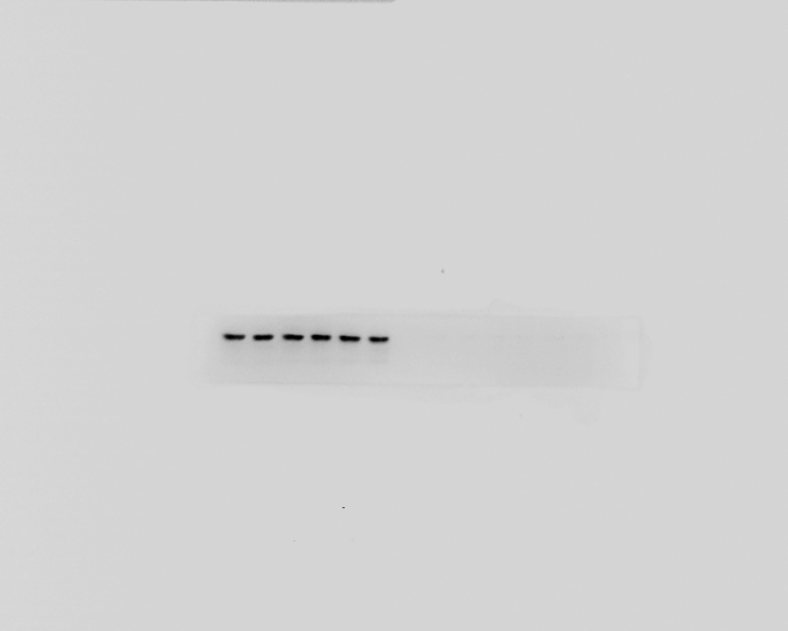
**

**#3 MMSET**

**
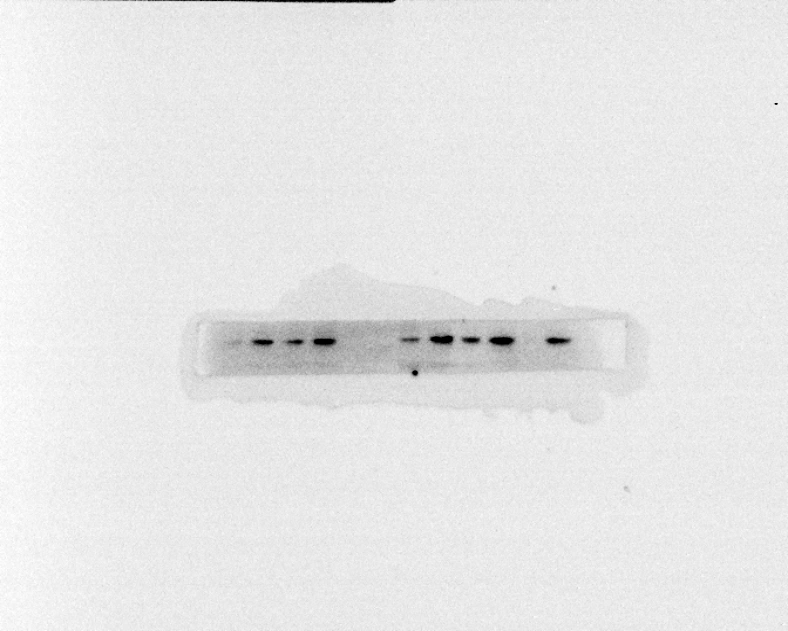
**

**β-Actin**

**
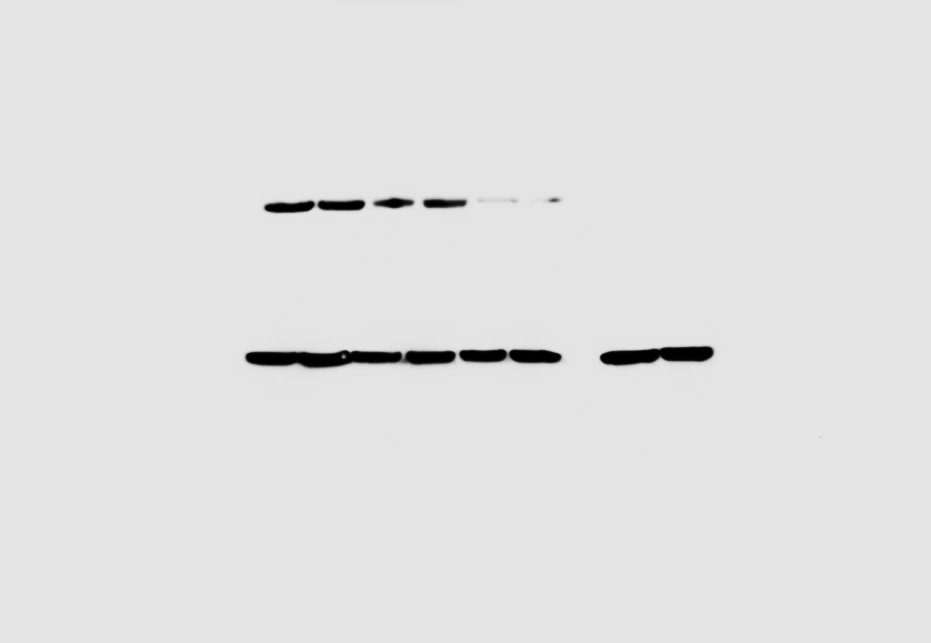
**

**Fig 4c**

**#1 H3K36me2**

**
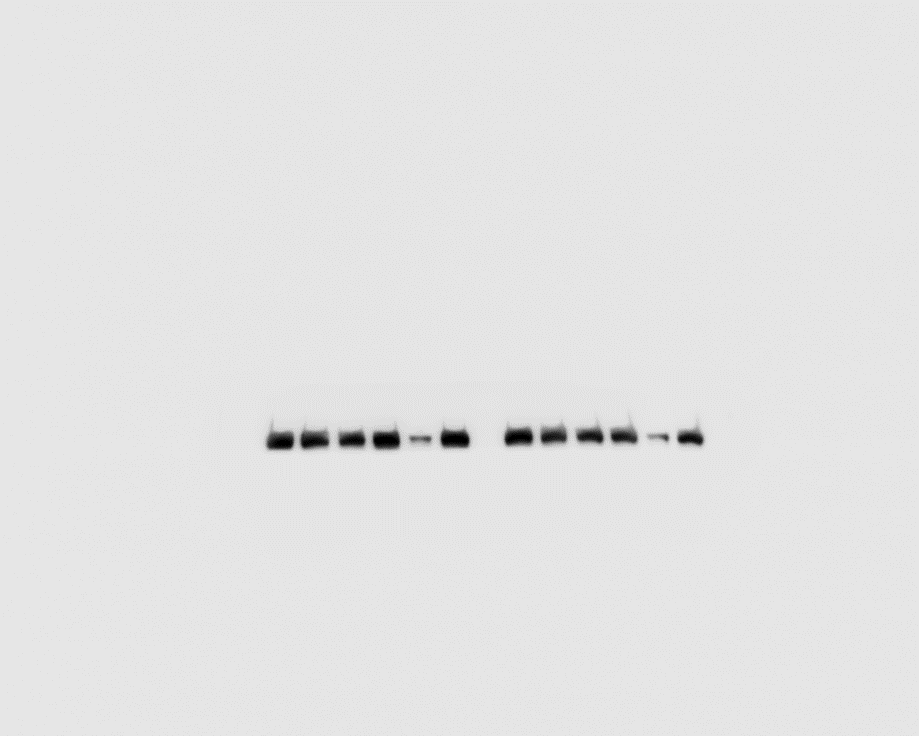
**

**H3**

**
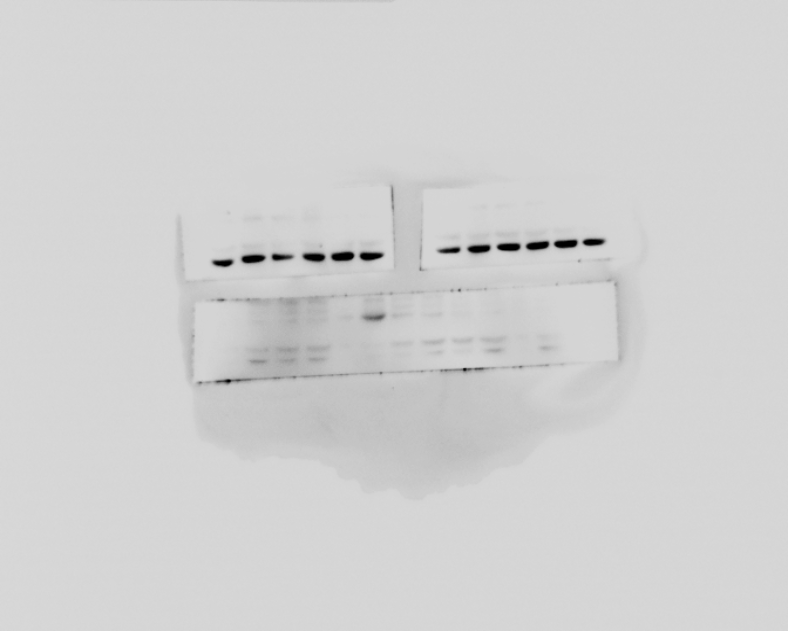
**

**#2 H3K36me2**

**
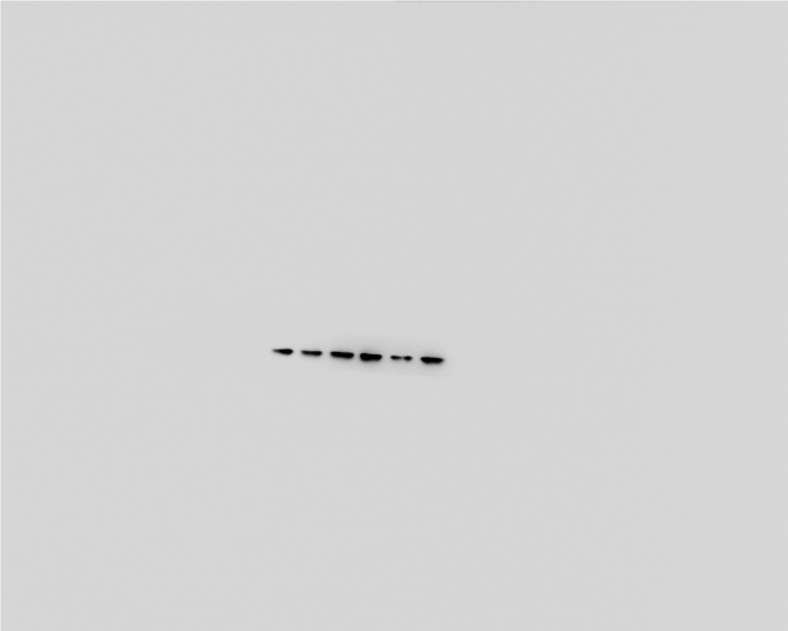
**

**H3**

**
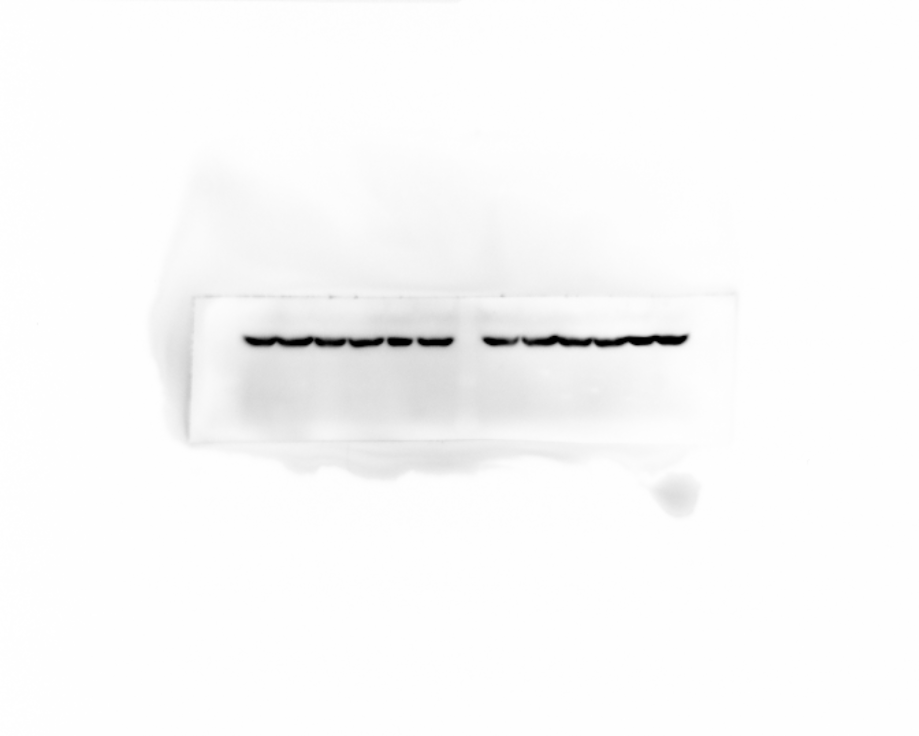
**

**#3 H3K36me2**


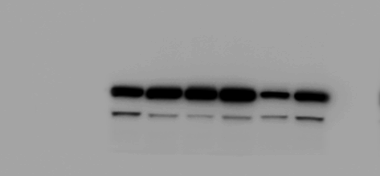


**H3**

**
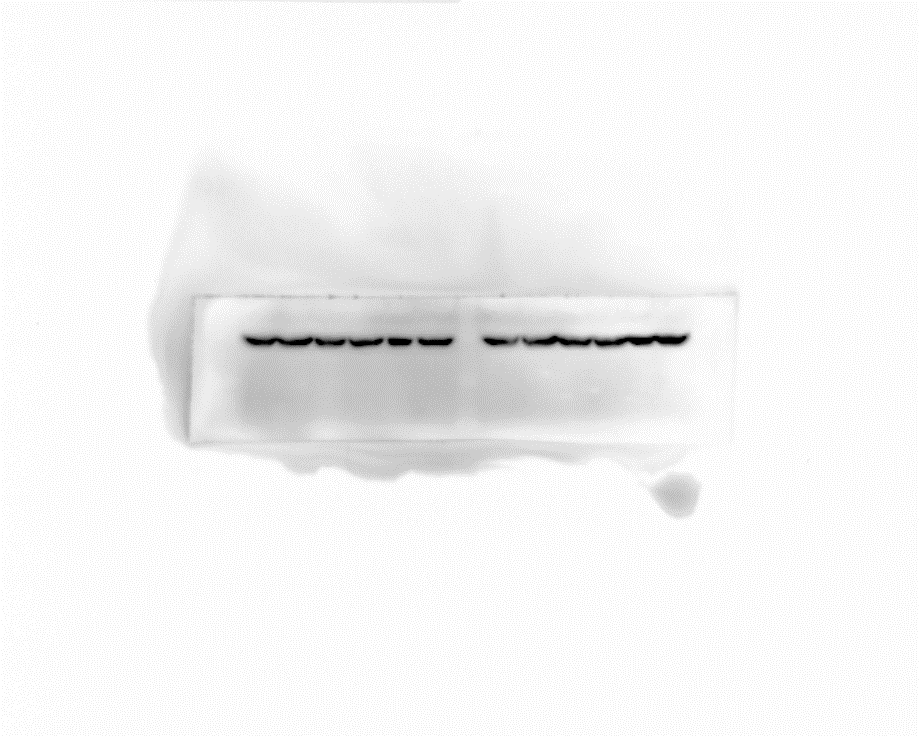
**

**Fig 5a**

**MMSET**

**
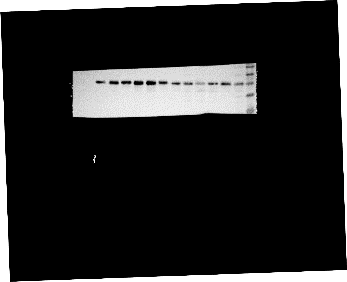
**

**H3K36me2**

**
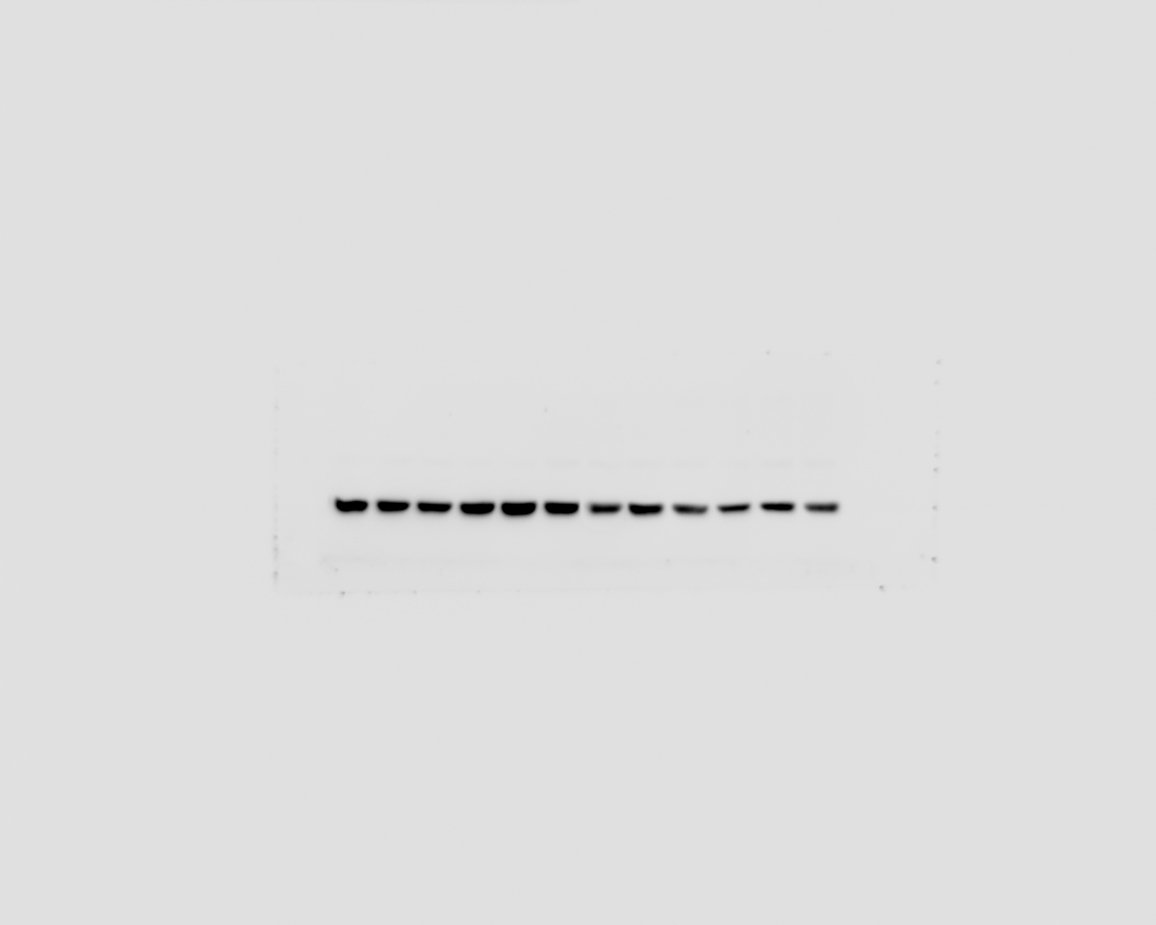
**

**H3K27me3**

**
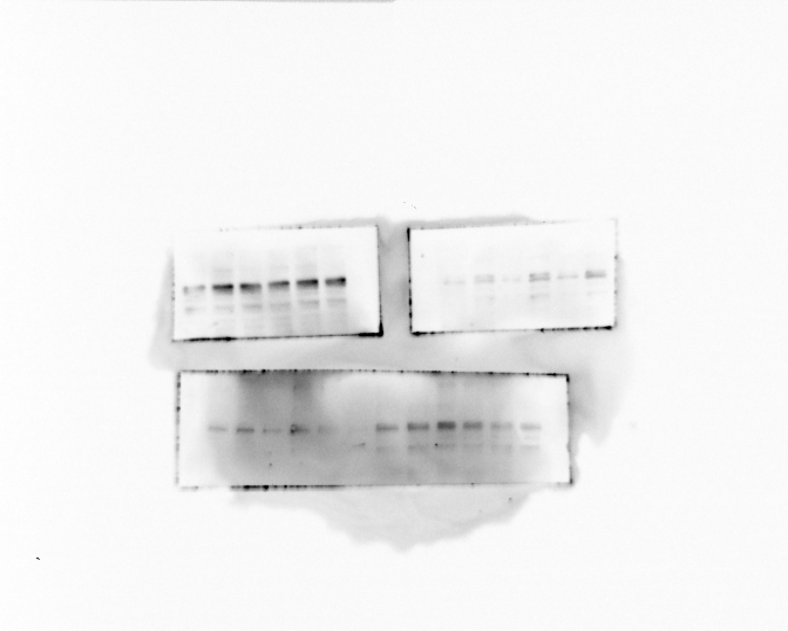
**

**H3**


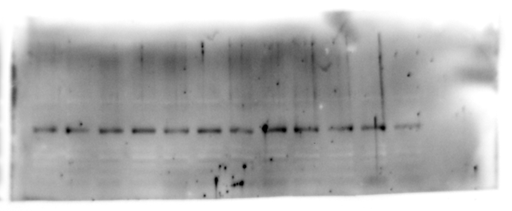


**β-Actin**

**
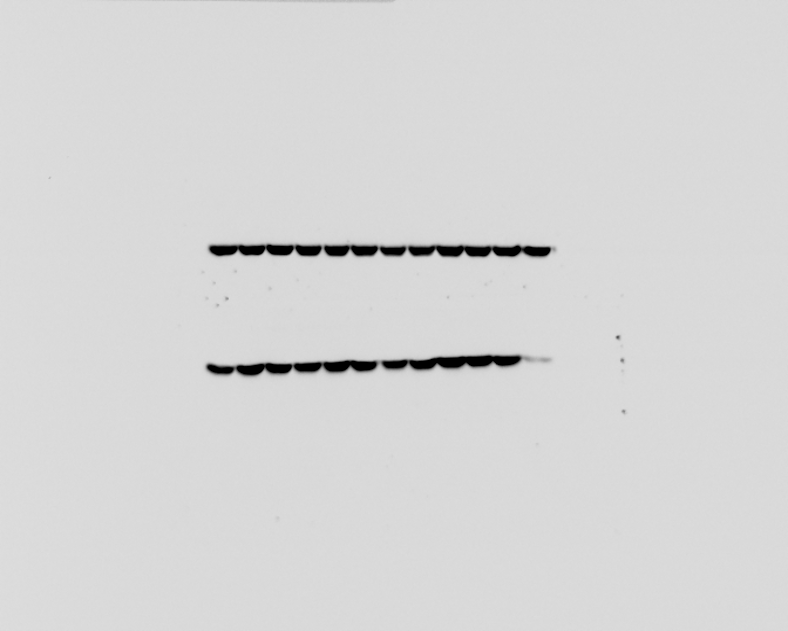
**

**Fig 5b**

**MMSET**

**
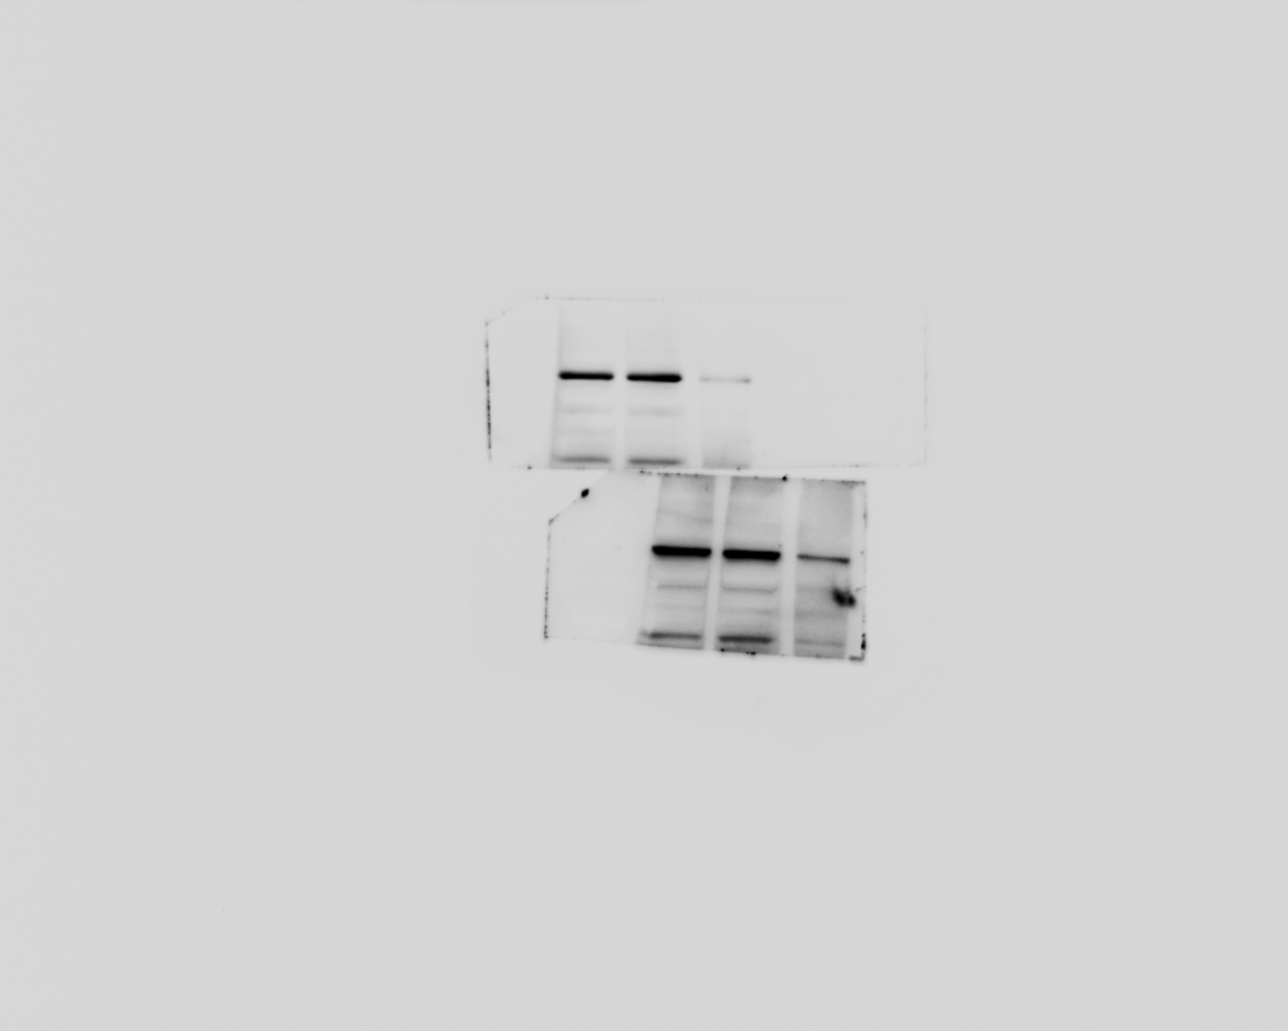
**

**H3K36me2**

**
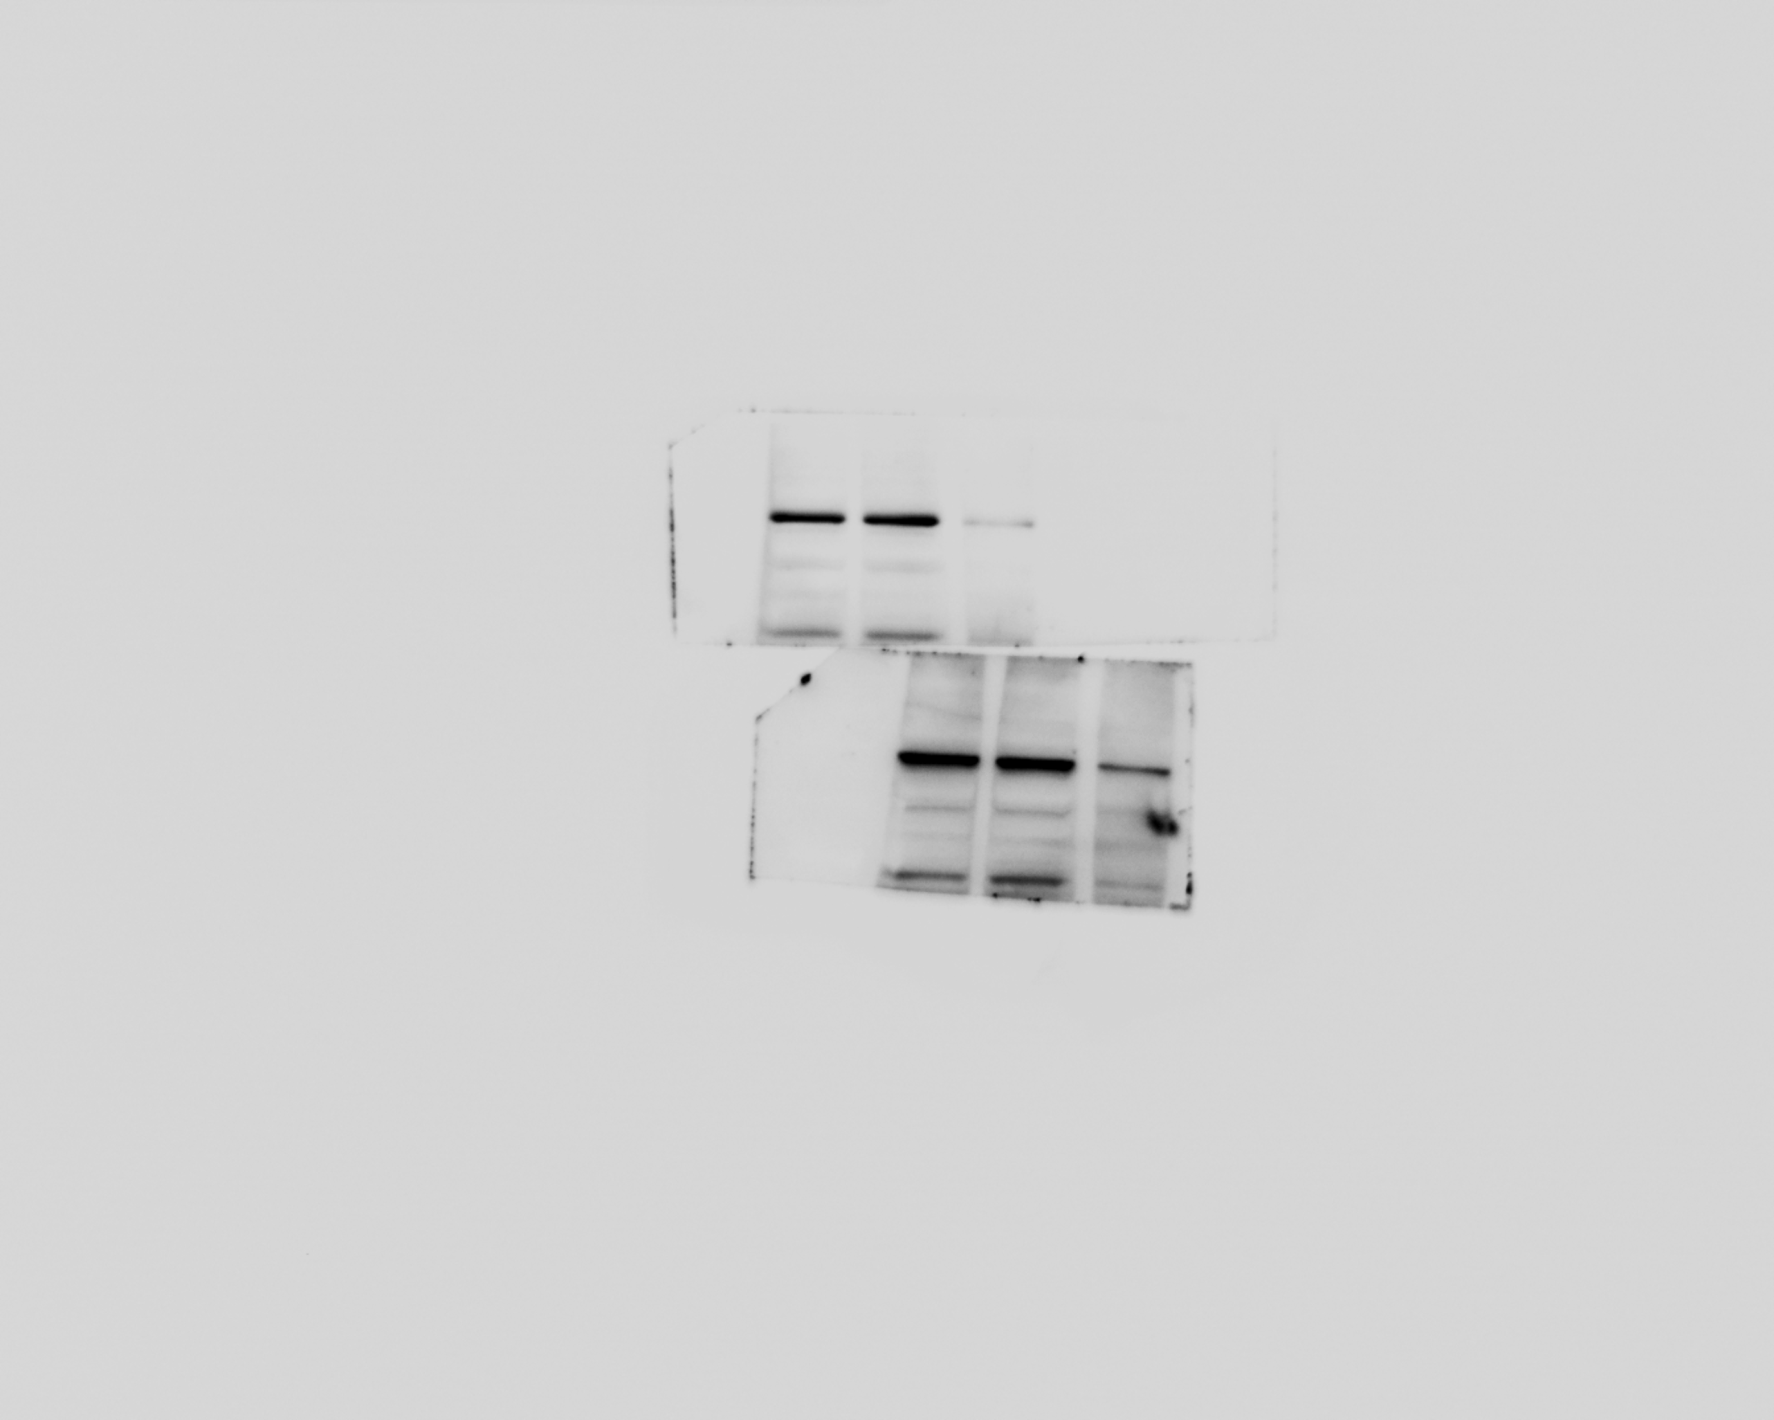
**

**β-Actin**

**
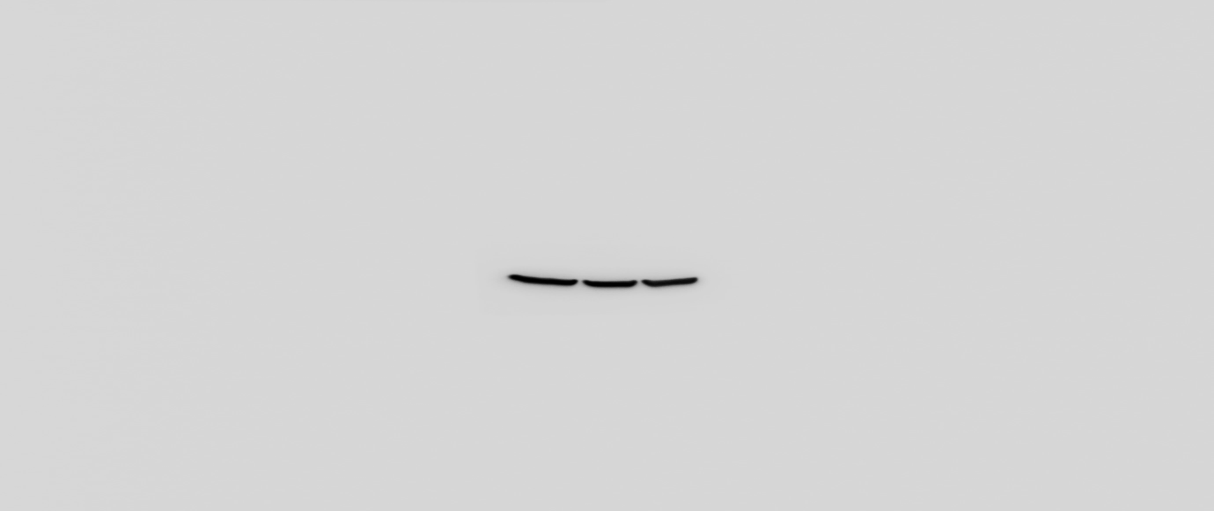
**

**MMSET**

**

**

**H3K36me2**

**
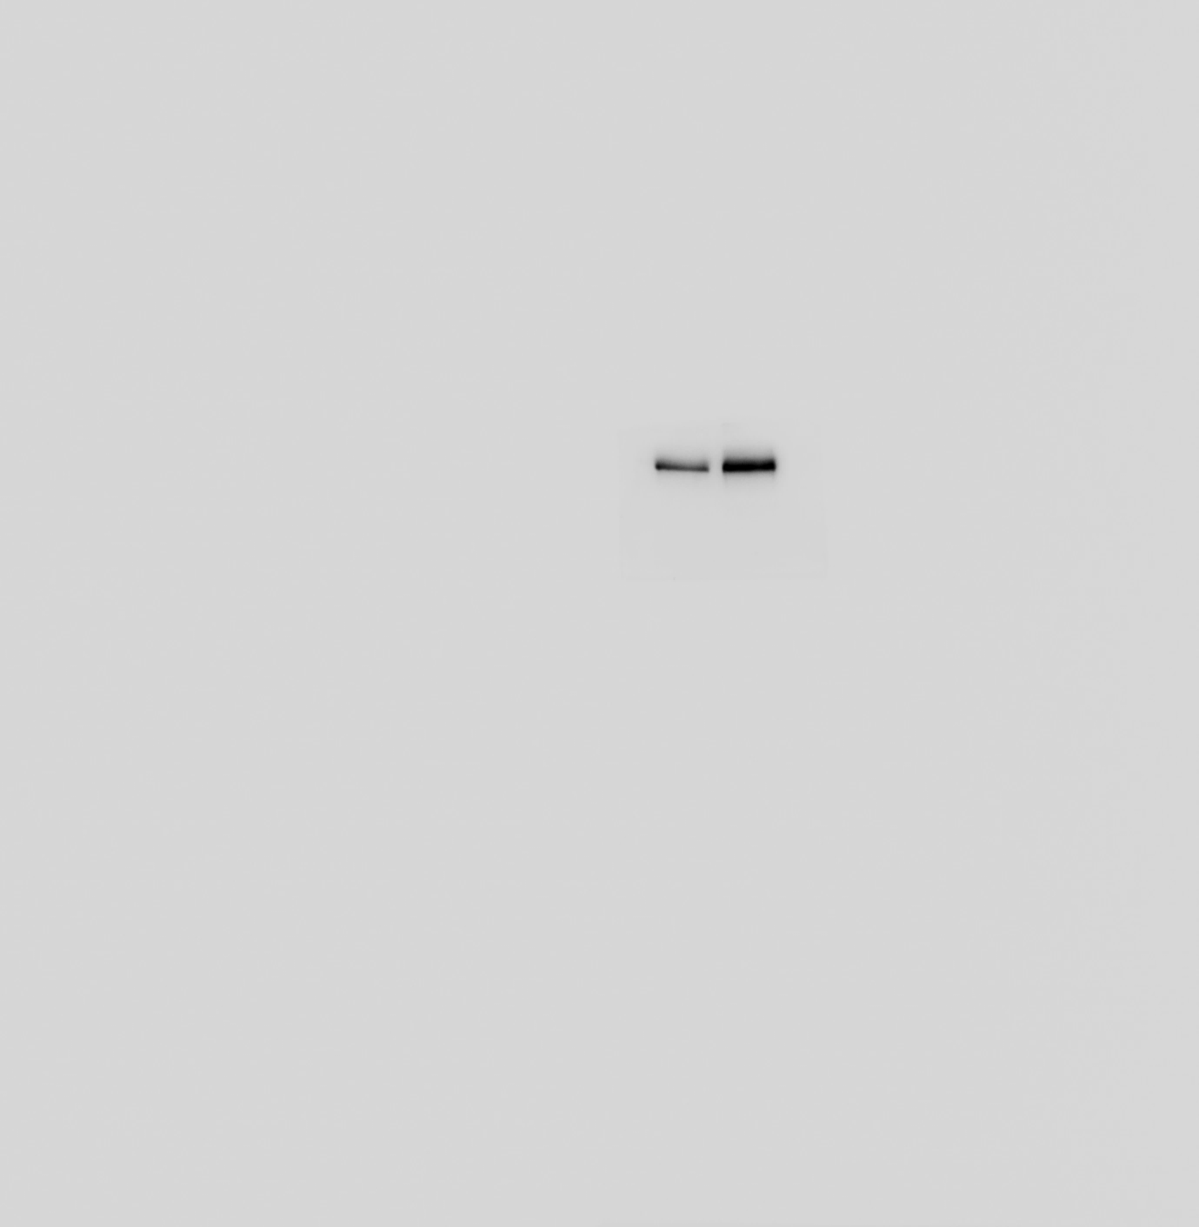
**

**β-Actin**

**
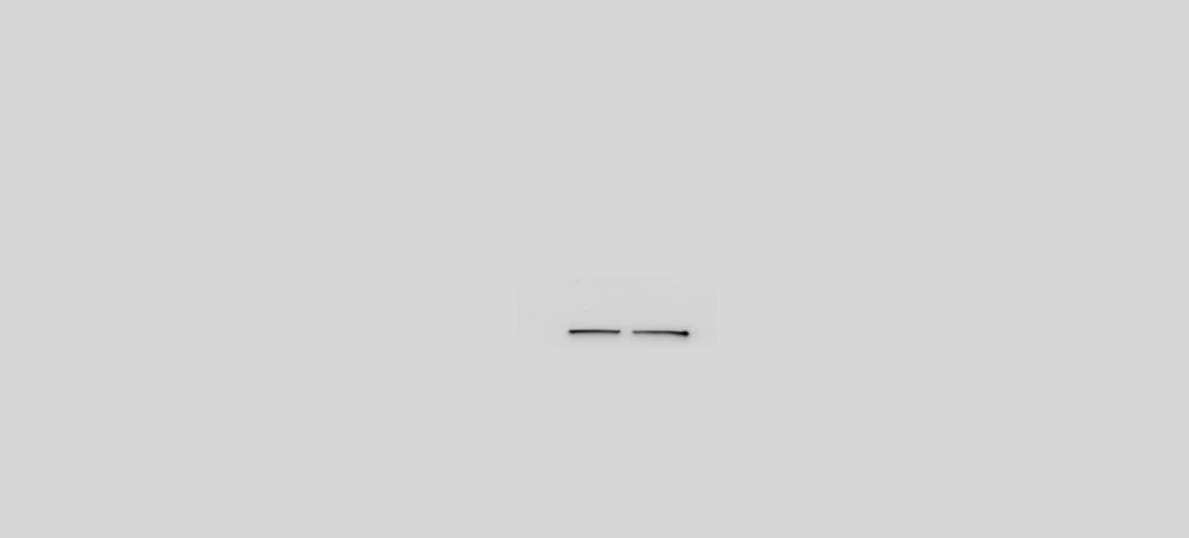
**

**Fig 6c**

**MMSET**

**
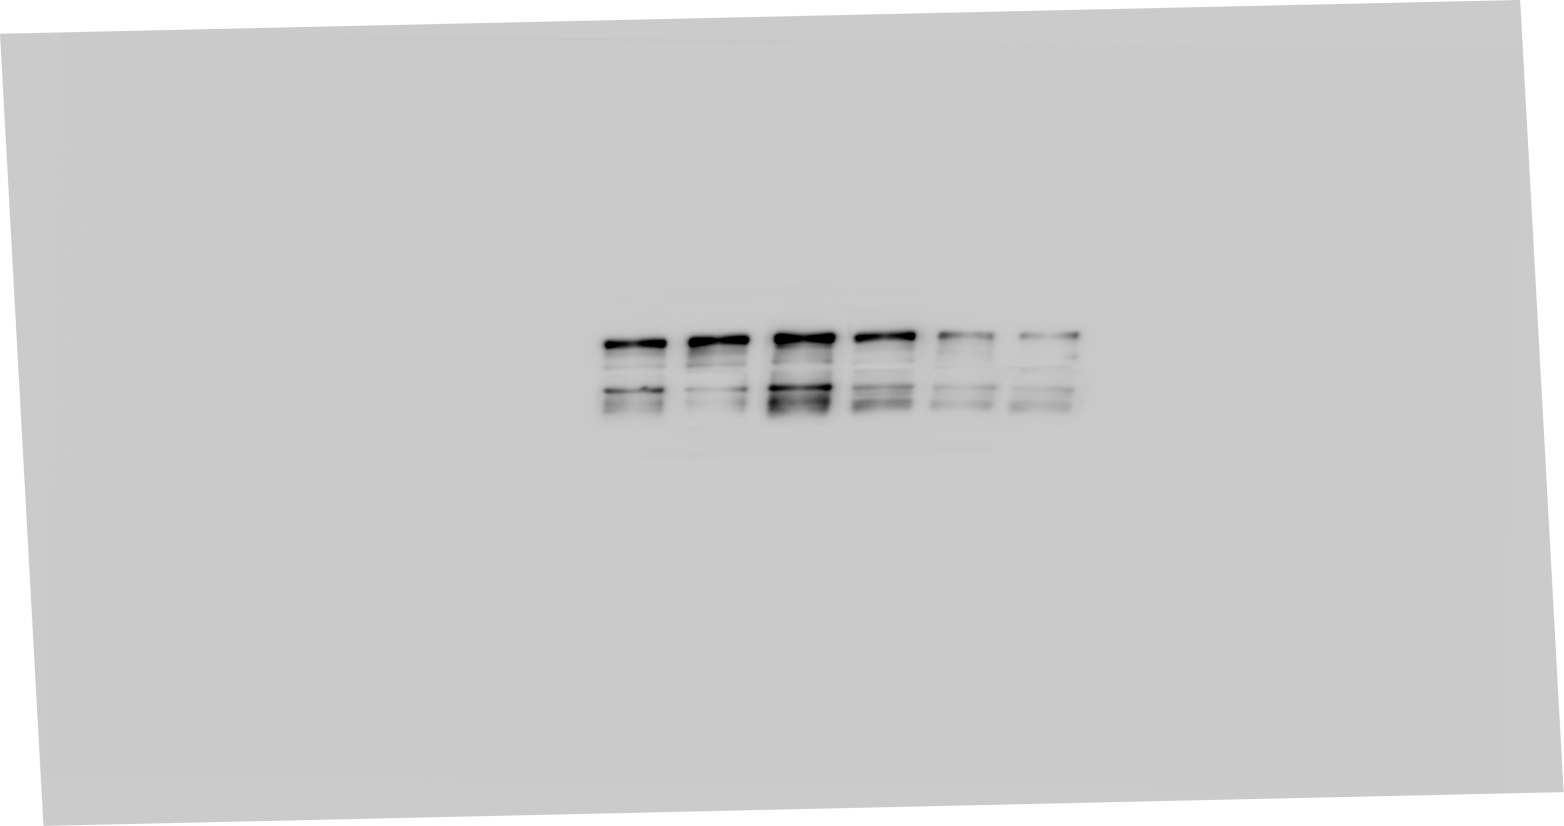
**

**DNMT3b**

**
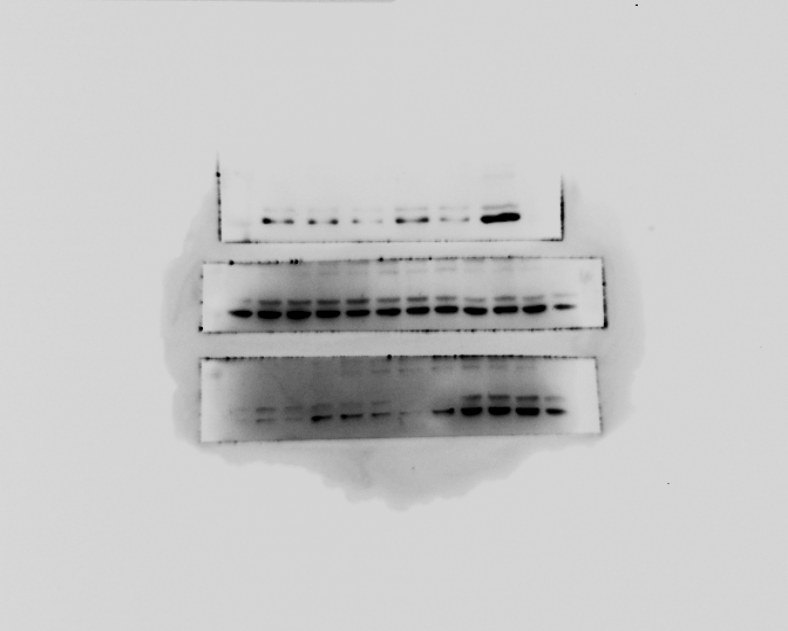
**

**β-Actin**

**
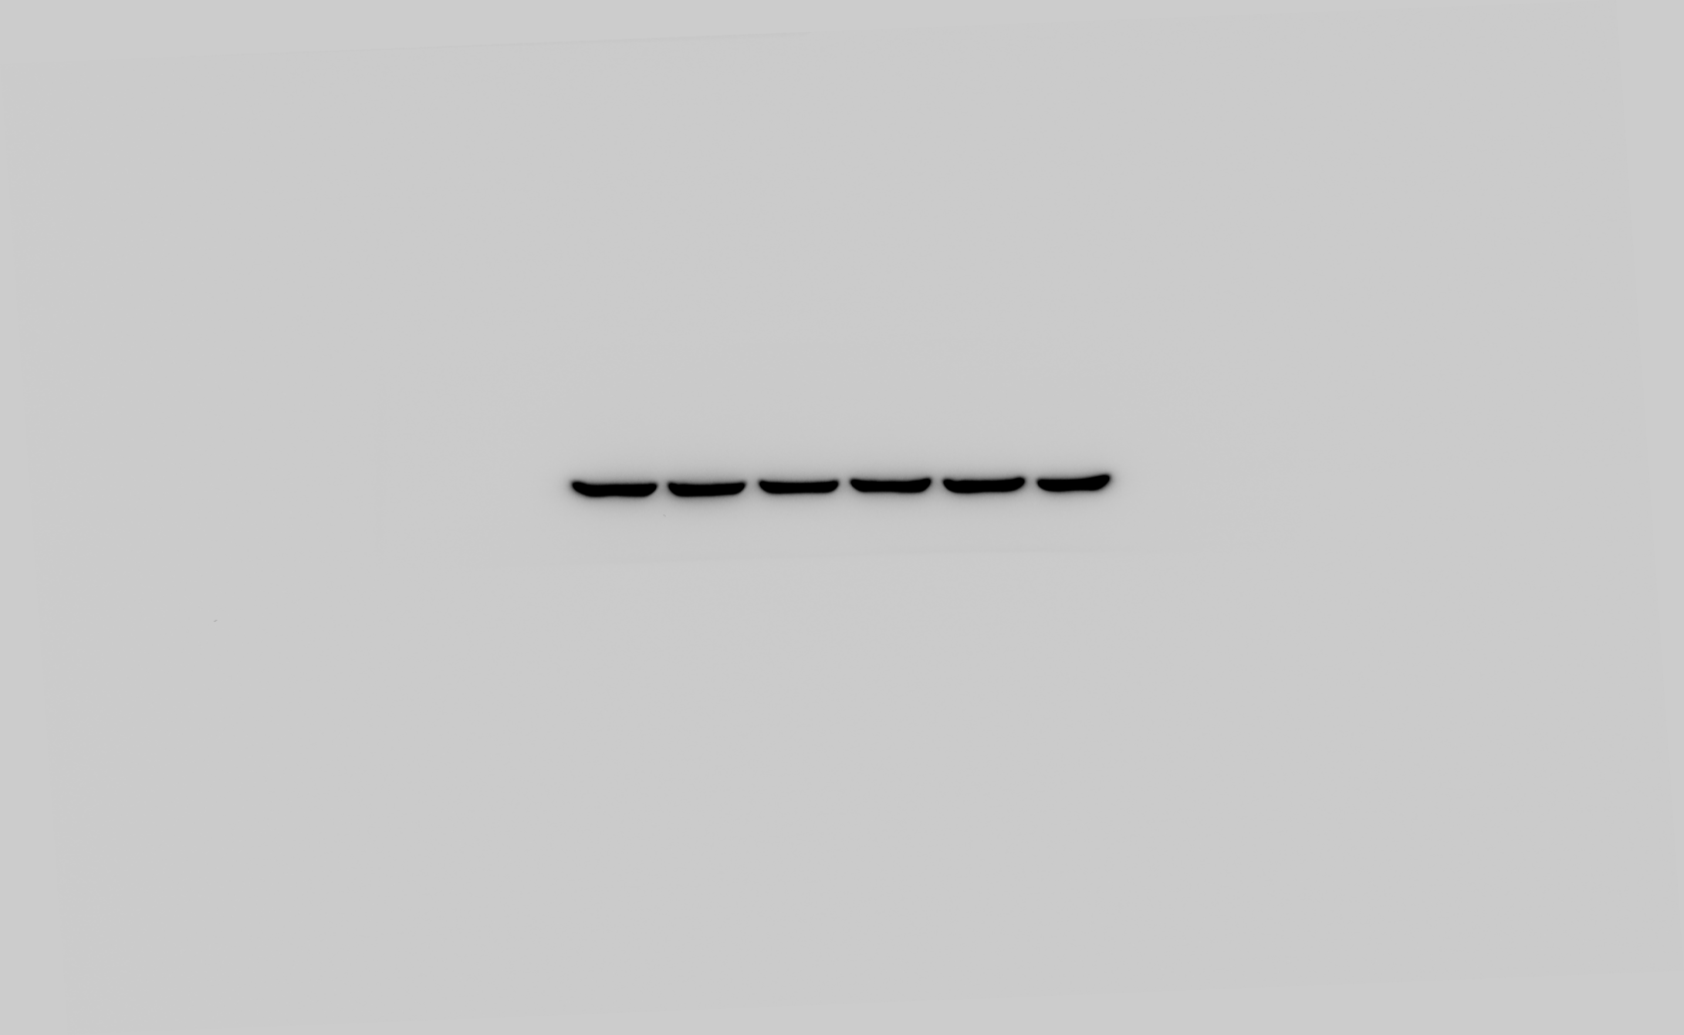
**

**Fig 6d**

**MMSET**

**
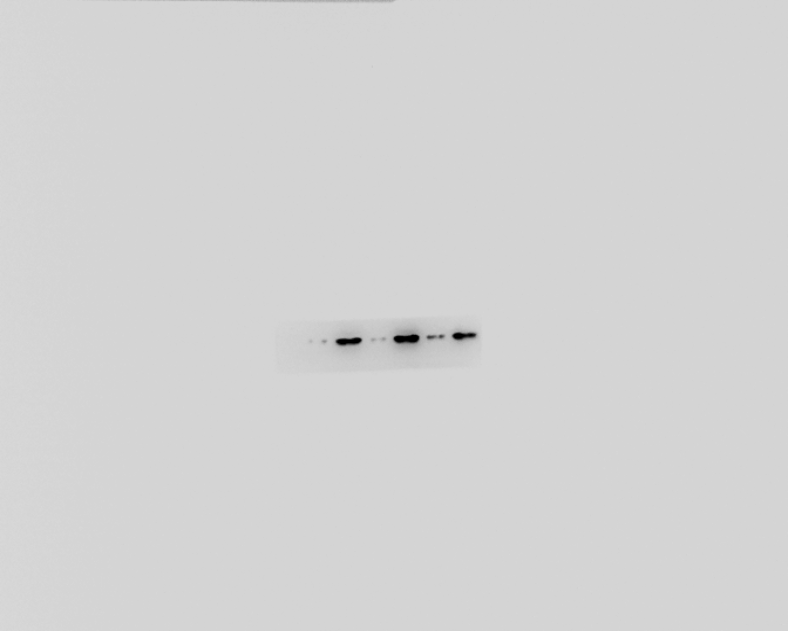
**

**β-Actin**

**
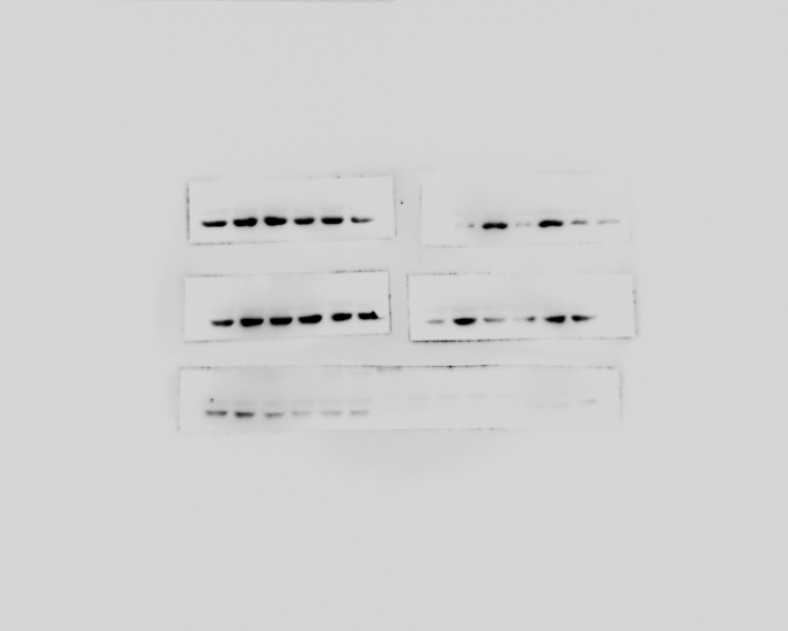
**

**Fig 6e**

**MMSET**

**
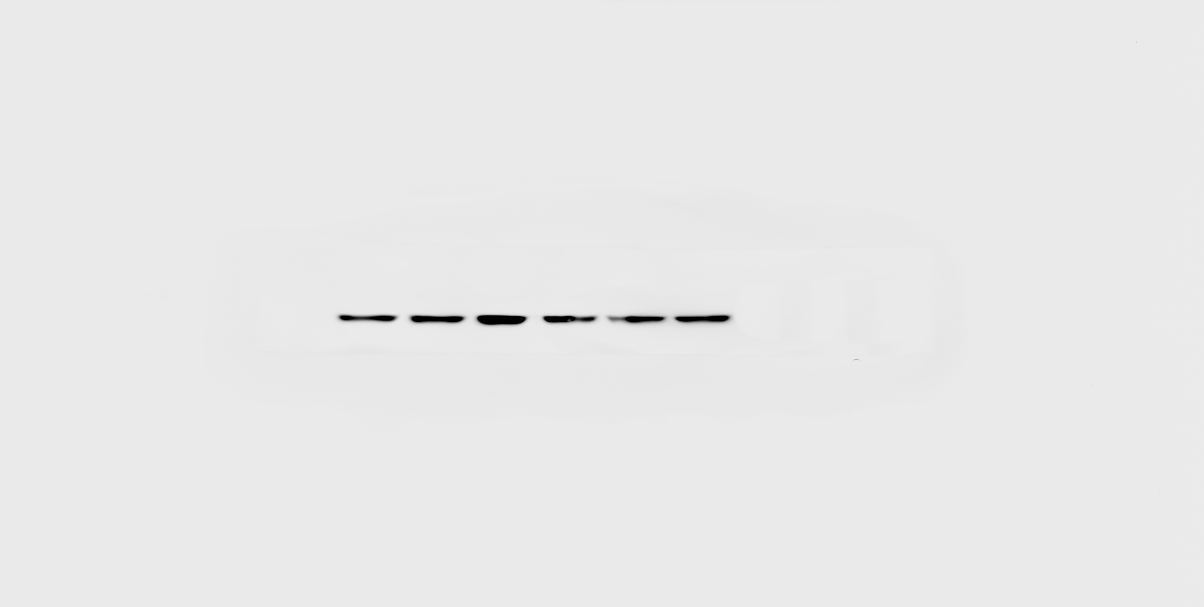
**

**β-Actin**

**
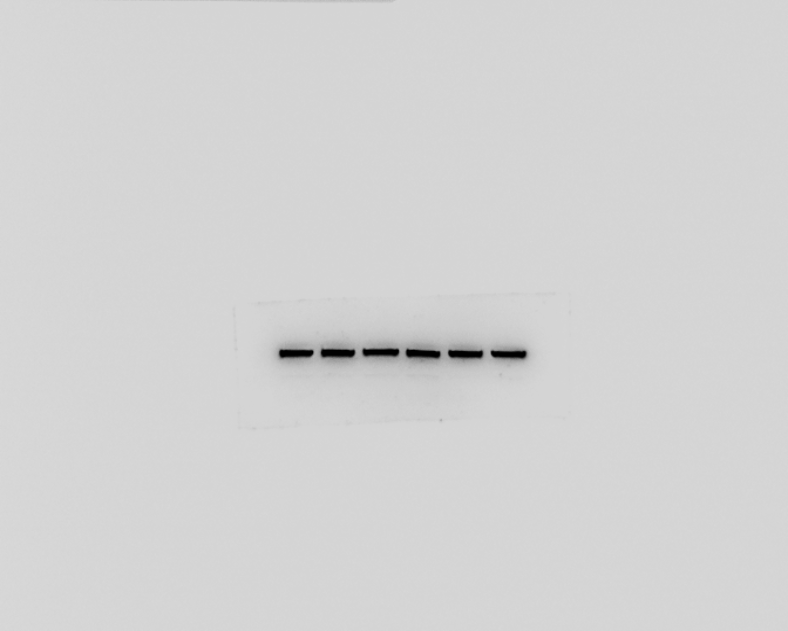
**

**Fig 6f**

**DNMT3b**

**
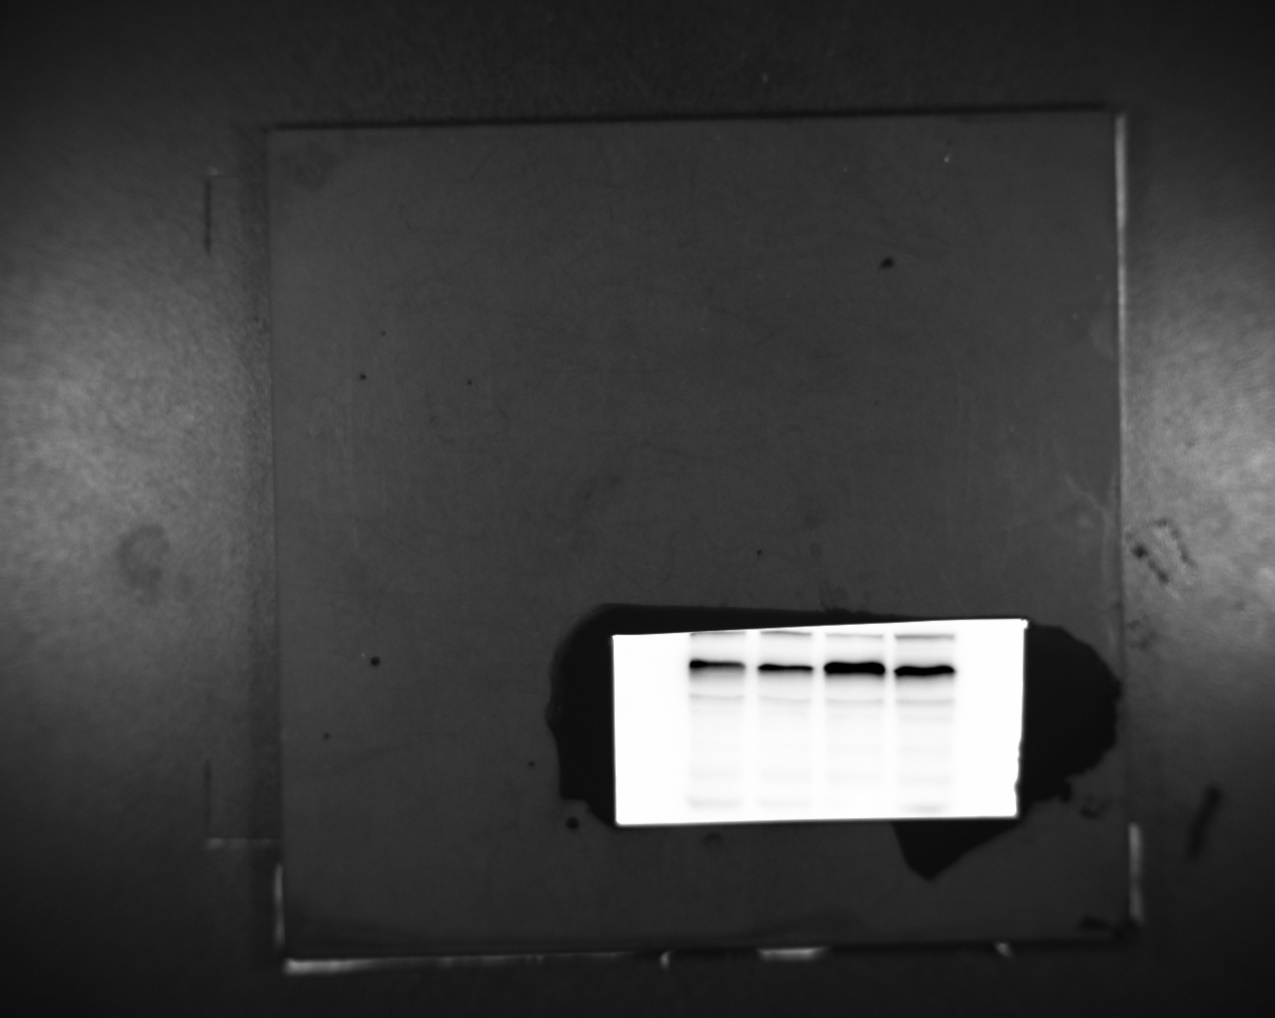
**

**MMSET**

**
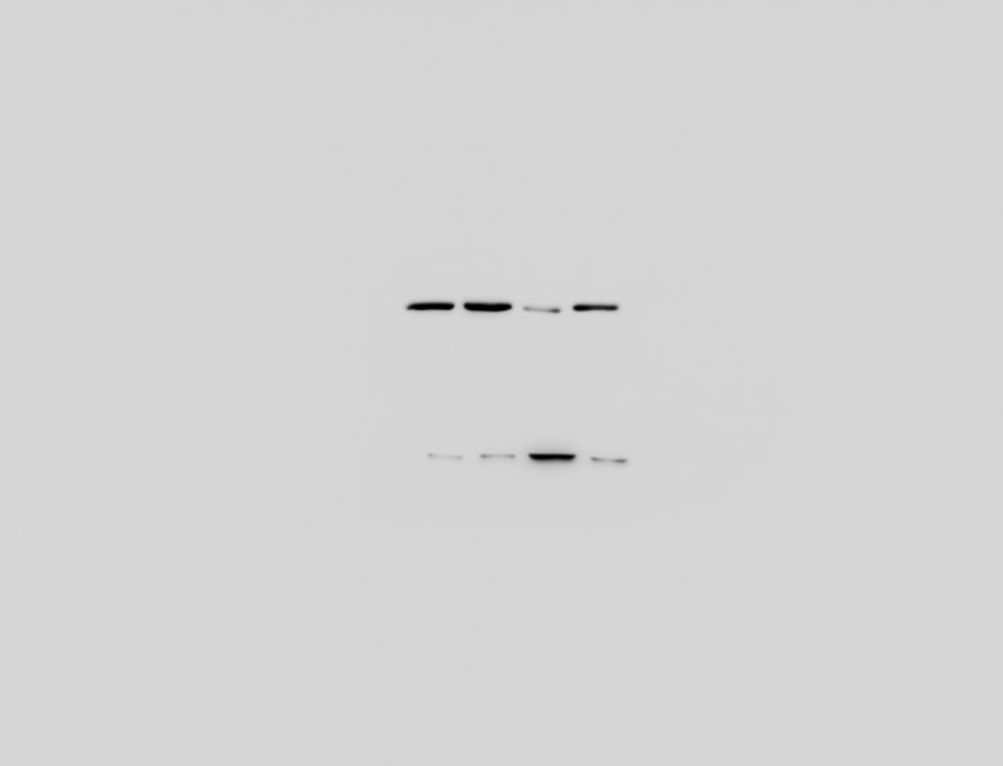
**

**RUNX2**

**
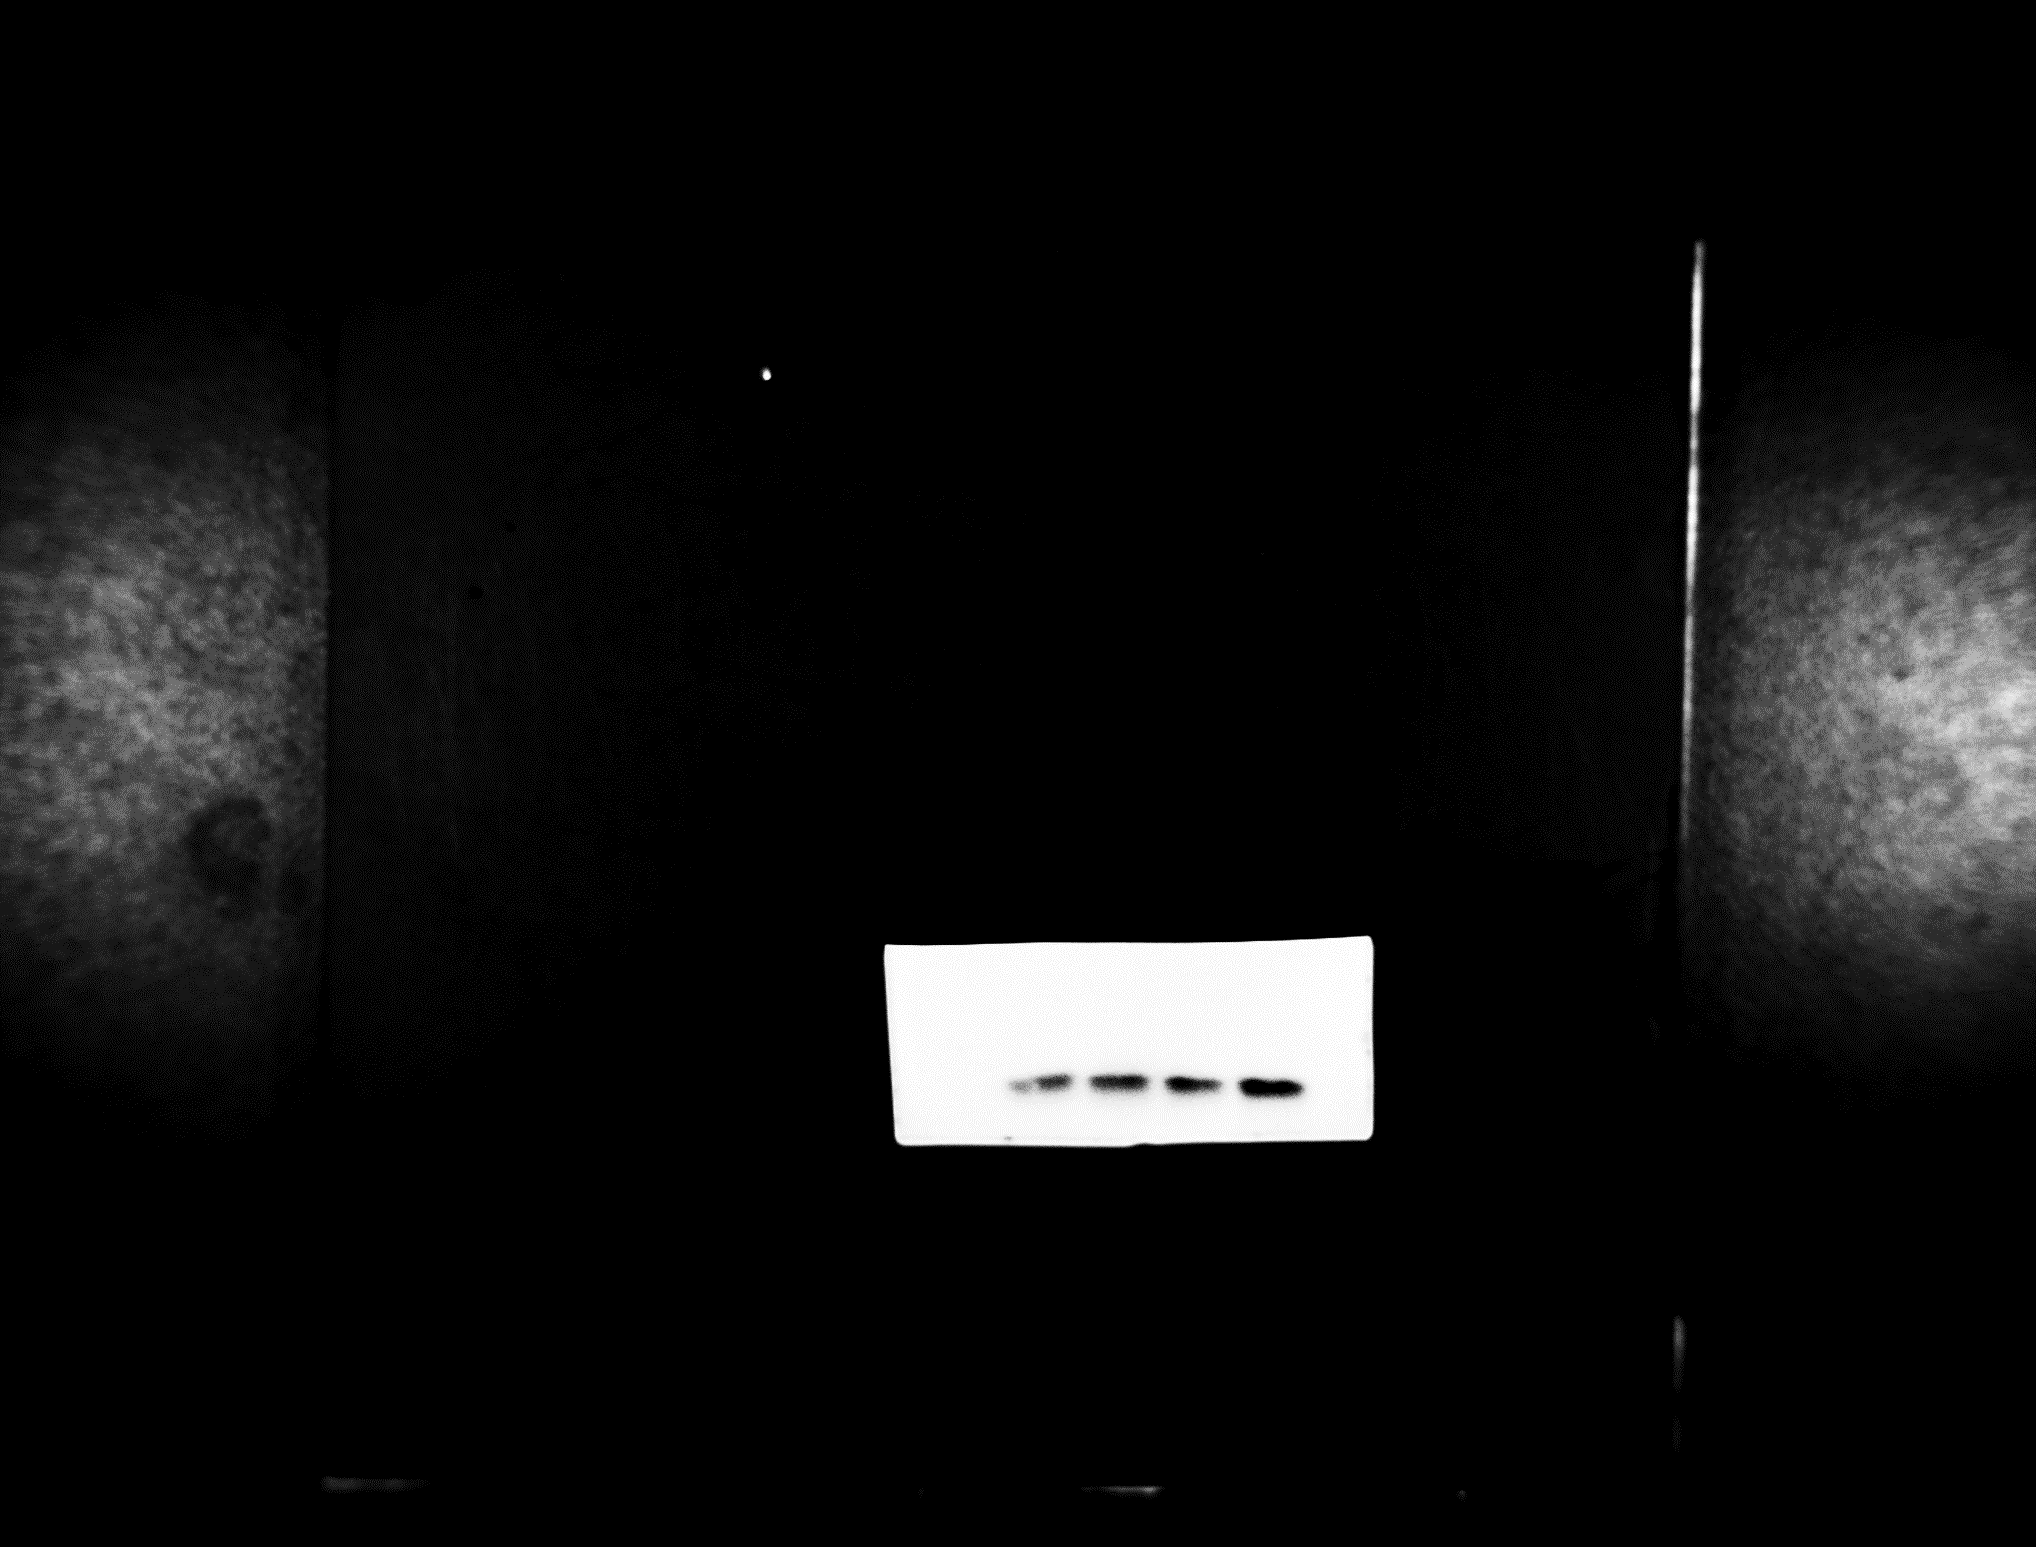
**

**SP7**

**
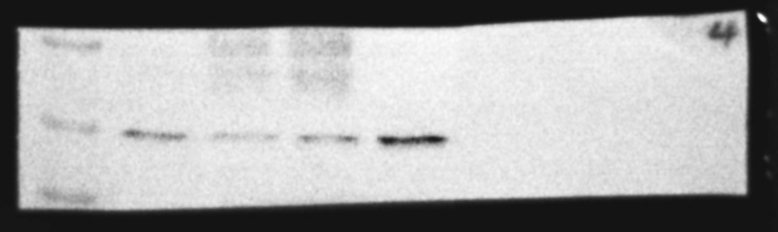
**

**β-Actin**

**
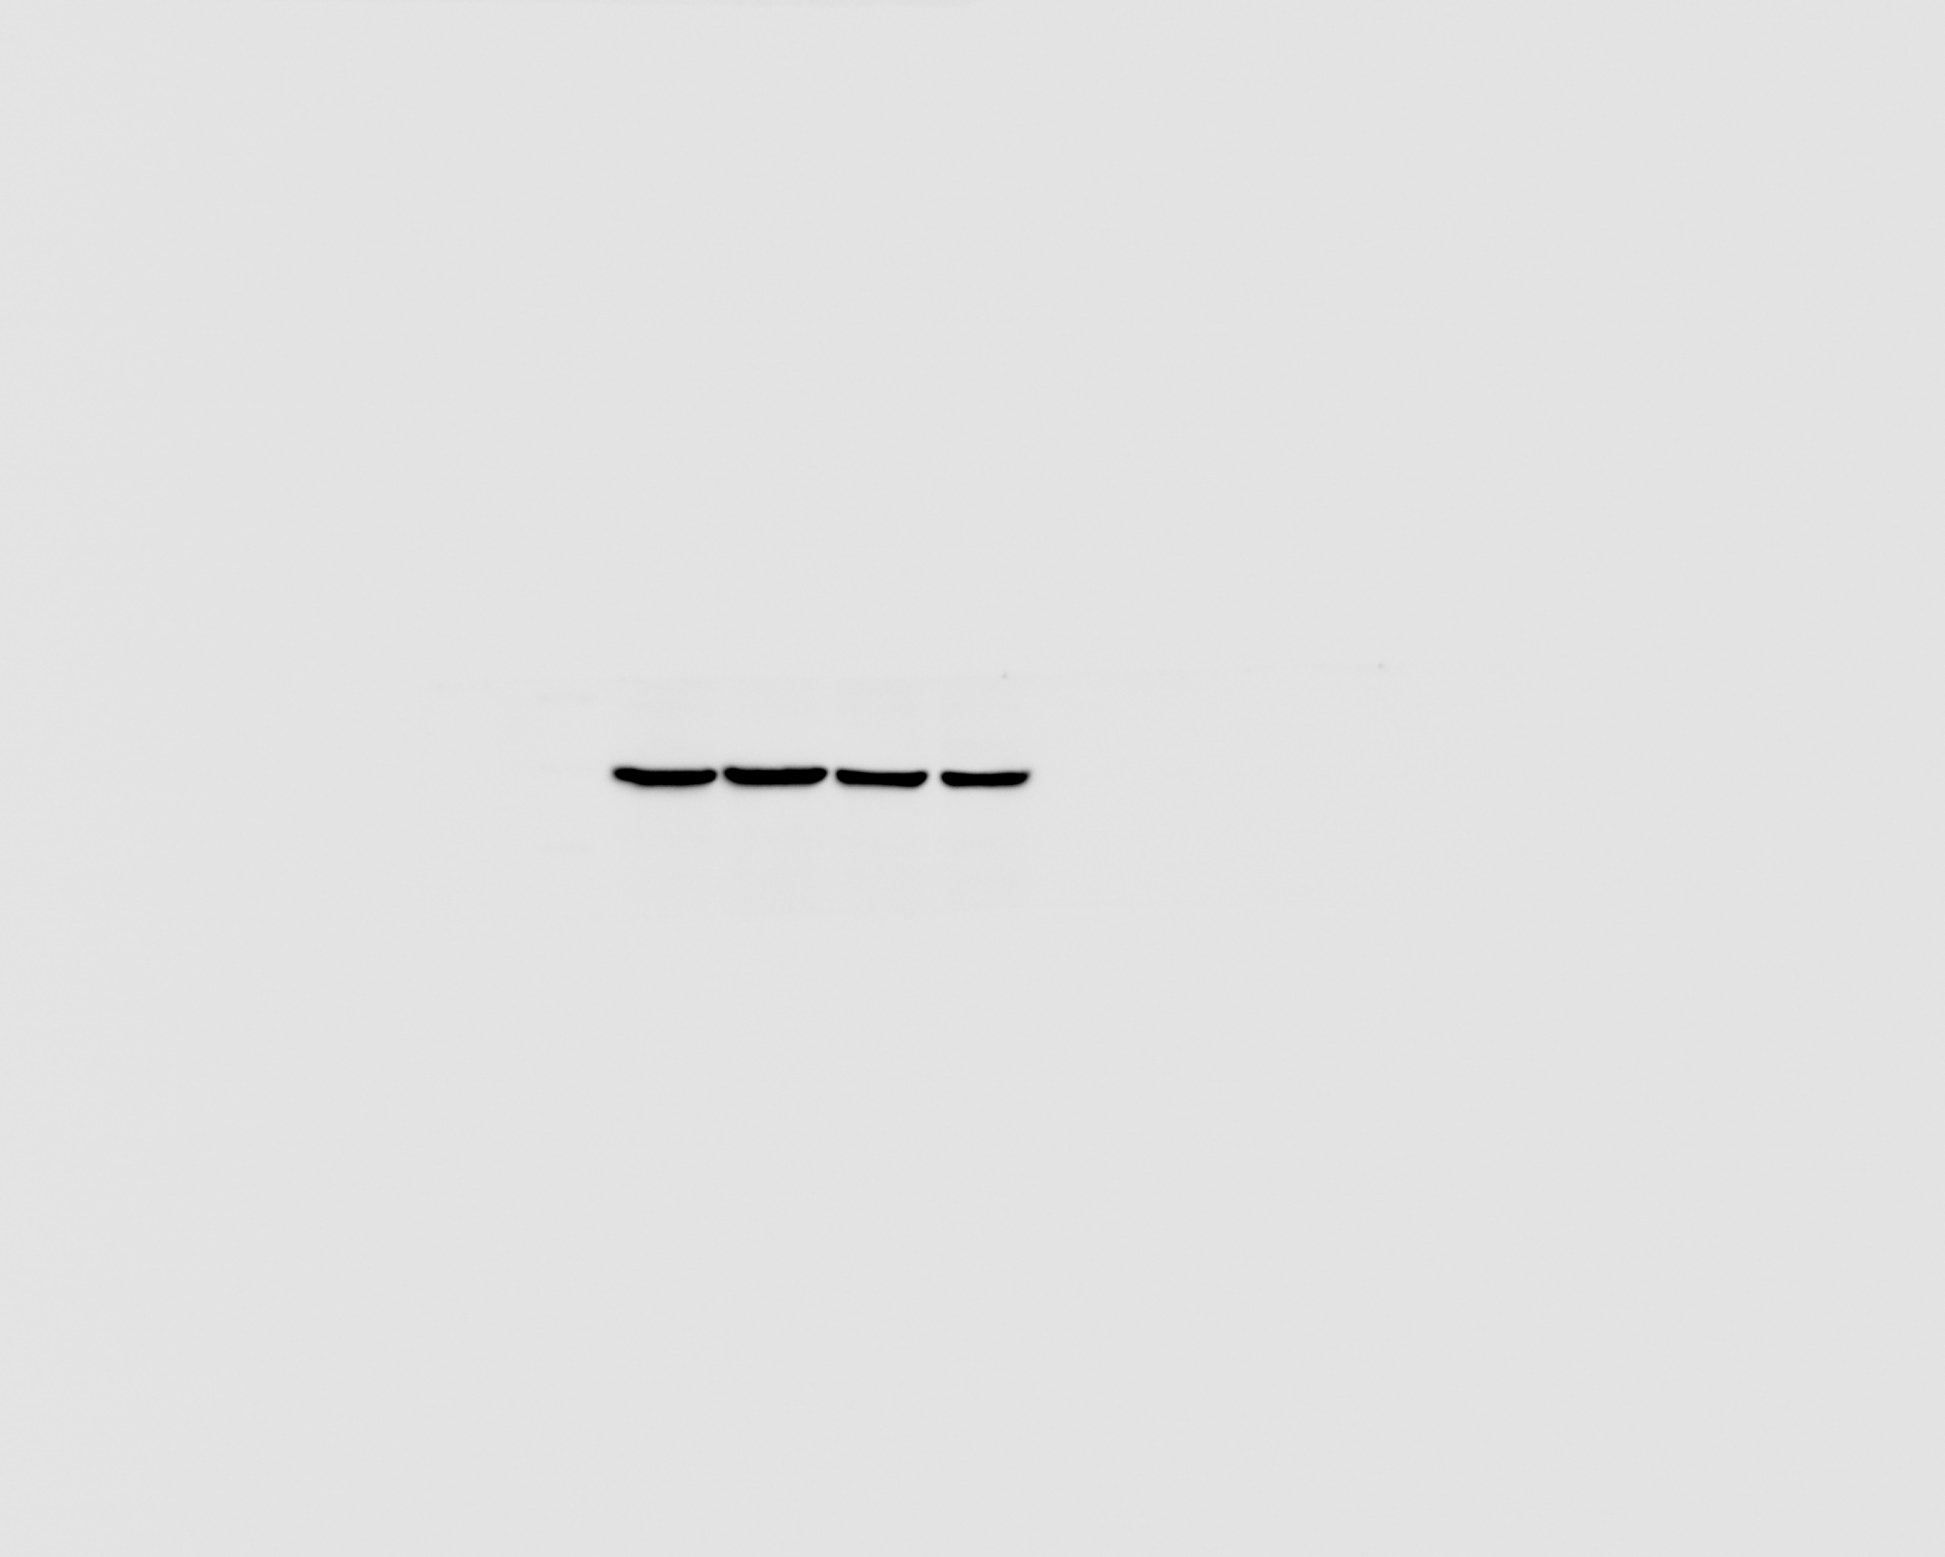
**

**S Fig 2a**

**DNMT3b**


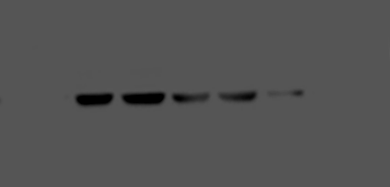


**β-Actin**

**
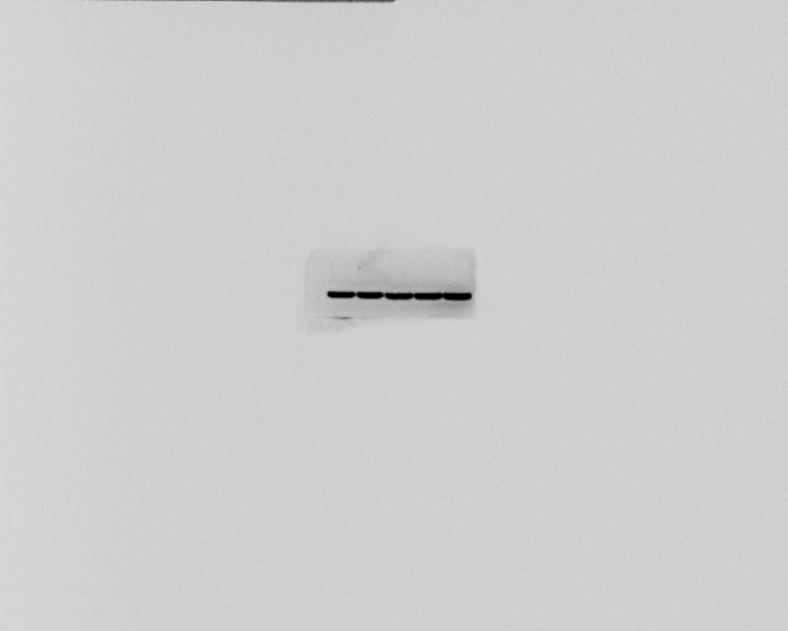
**

**Fig 7e**

**Adult**

**MMSET**

**
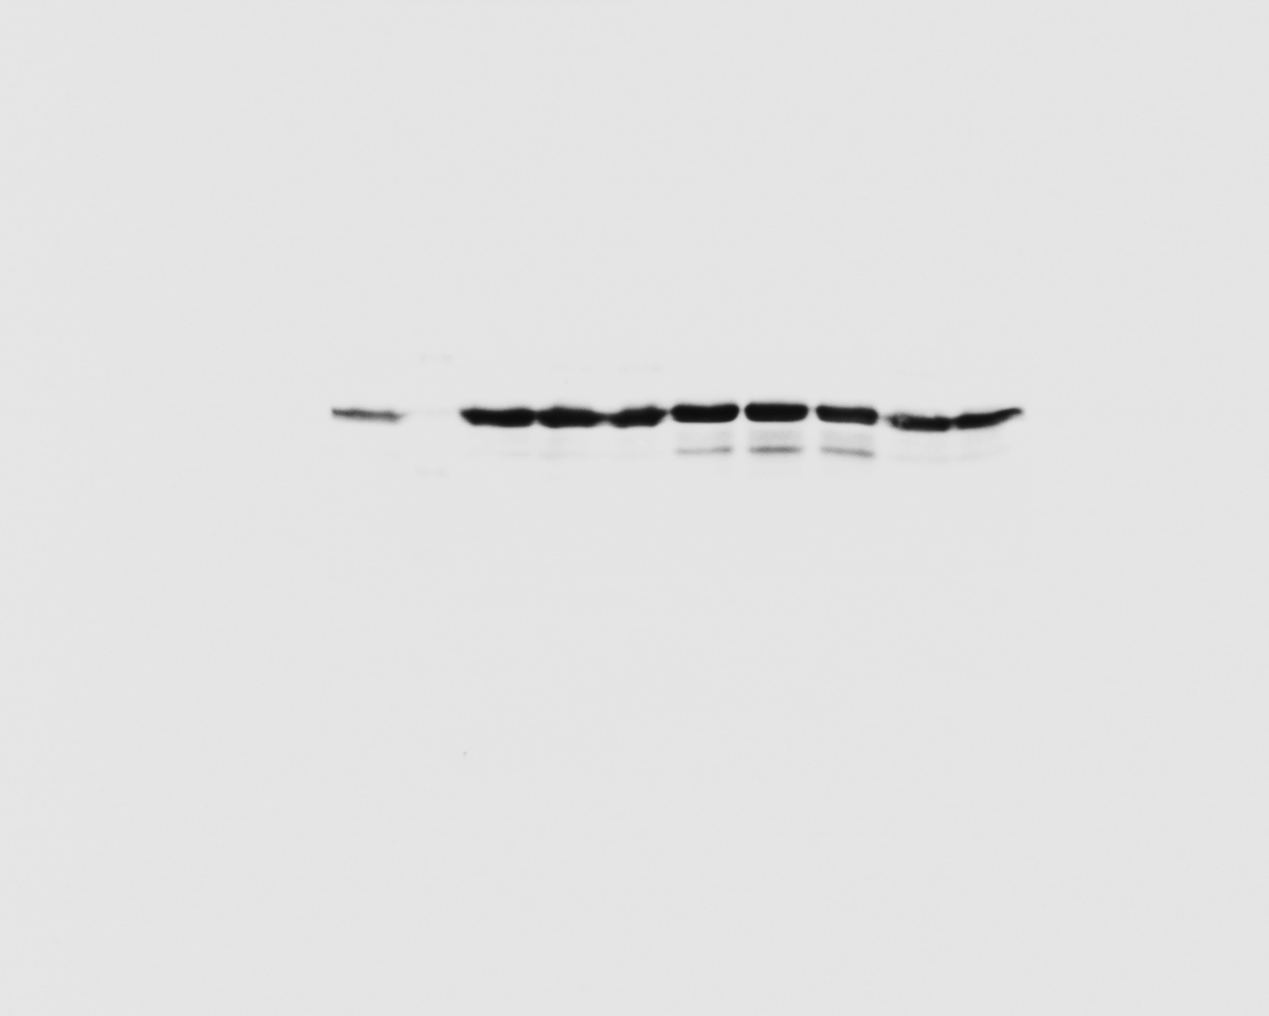
**

**β-Actin**

**
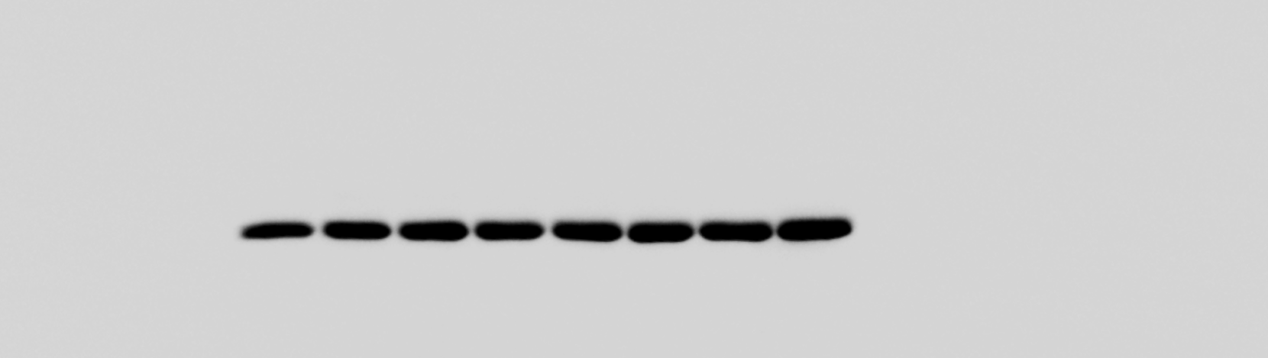
**

**Aging**

**MMSET**

**
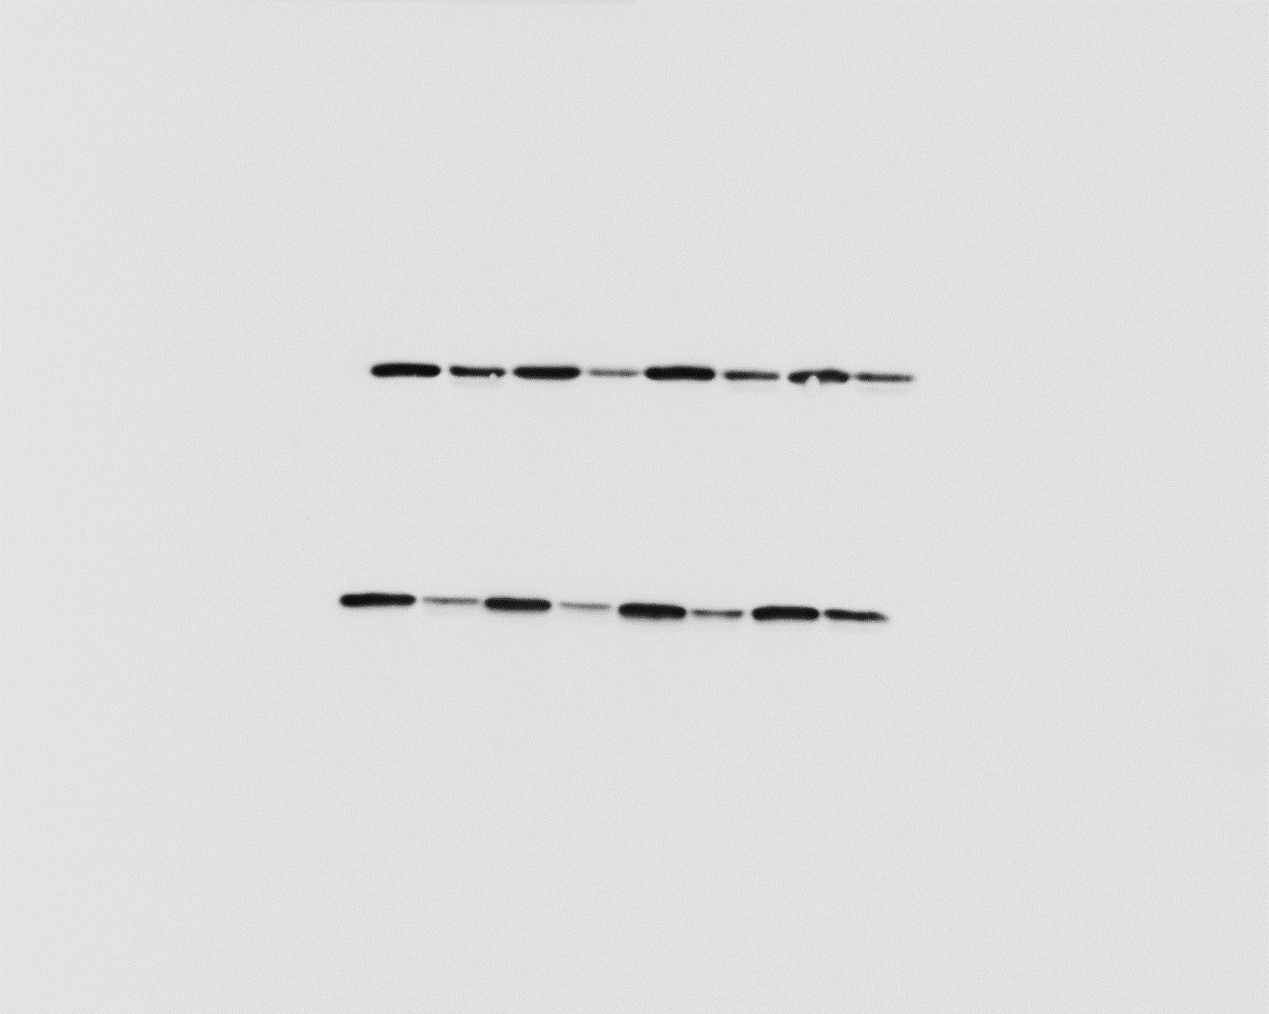
**

**β-Actin**

**
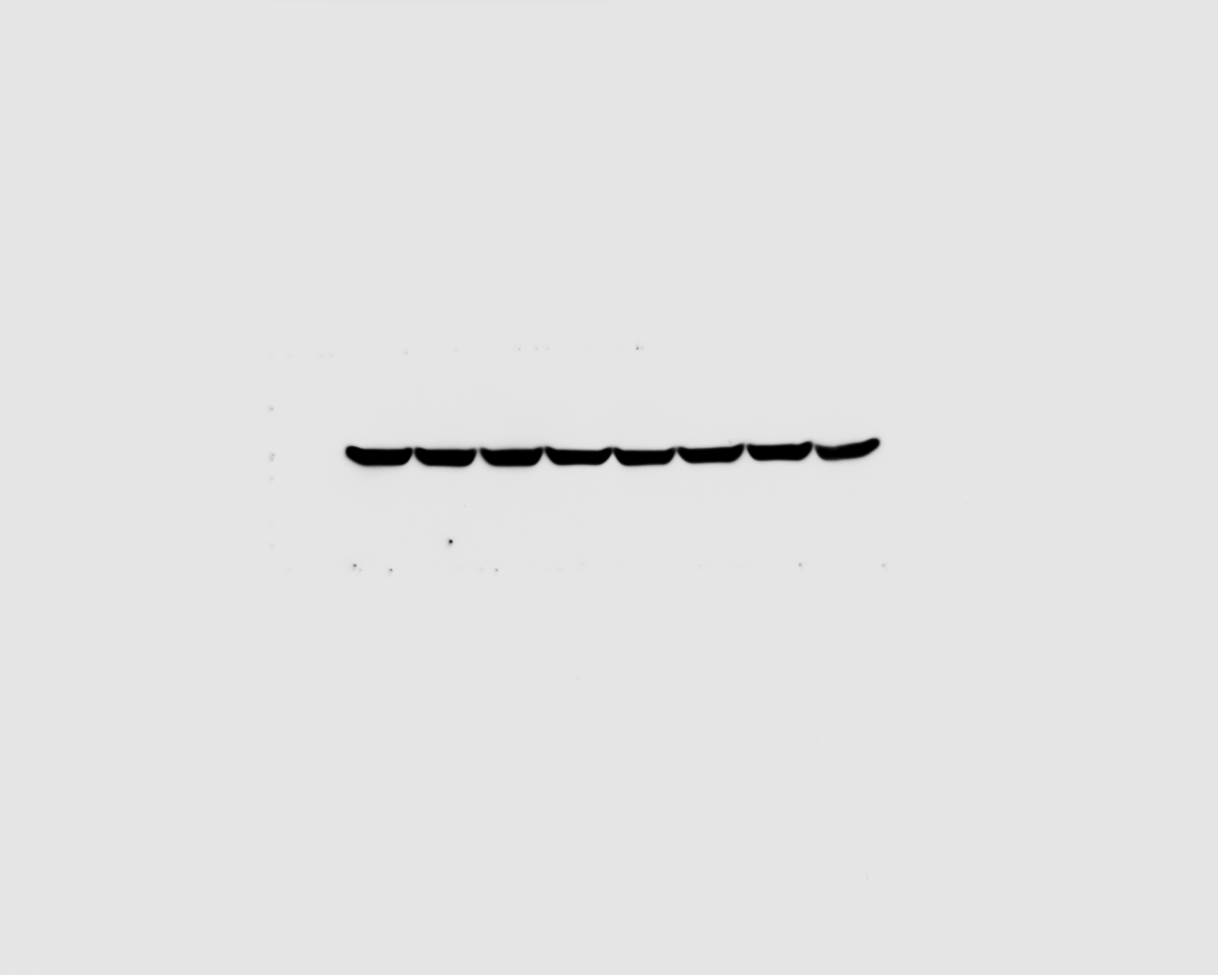
**
